# Supplementary material for: Metagenomic probing toward an atlas of the taxonomic and metabolic foundations of the global ocean genome
Source: Frontiers journal article supplement (doi:10.3389/fsci.2023.1038696), 2024-01-16
Supplement: Table_1.XLSX [file Table_1.XLSX]

## Sheet: TABLE S1
Metabolism	KO	Metabolic Pathway	Enzyme full name, code and short form
Carbon metabolism	K09709	3-Hydroxypropionate bi-cycle	meh; 3-methylfumaryl-CoA hydratase [EC:4.2.1.153]
	K14470	3-Hydroxypropionate bi-cycle	mct; 2-methylfumaryl-CoA isomerase [EC:5.4.1.3]
	K00625	Acetate production / utilization	pta; phosphate acetyltransferase [EC:2.3.1.8]
	K00925	Acetate production / utilization	ack; acetate kinase [EC:2.7.2.1]
	K00855	Calvin Cycle	PRK, prkB; phosphoribulokinase [EC:2.7.1.19]
	K01601	Calvin Cycle	rbcL; ribulose-bisphosphate carboxylase large chain [EC:4.1.1.39]
	K01602	Calvin Cycle	rbcS; ribulose-bisphosphate carboxylase small chain [EC:4.1.1.39]
	K03518	CO oxidation	coxS; aerobic carbon-monoxide dehydrogenase small subunit [EC:1.2.5.3]
	K03519	CO oxidation	coxM; aerobic carbon-monoxide dehydrogenase medium subunit [EC:1.2.5.3]
	K03520	CO oxidation	coxL; aerobic carbon-monoxide dehydrogenase large subunit [EC:1.2.5.3]
	K15016	Dicarboxylate-hydroxybutyrate cycle | Hydroxypropionate-hydroxybutylate cycle	enoyl-CoA hydratase / 3-hydroxyacyl-CoA dehydrogenase [EC:4.2.1.17 1.1.1.35]
	K00016	Fermentation	ldh; L-lactate dehydrogenase [EC:1.1.1.27]
	K00123	Fermentation	fdhF; formate dehydrogenase major subunit [EC:1.17.1.9]
	K15039	Hydroxypropionate-hydroxybutylate cycle	3-hydroxypropionate dehydrogenase (NADP+) [EC:1.1.1.298]
	K14138	Reductive acetyl-CoA pathway (Wood-Ljungdahl pathway)	acsB; acetyl-CoA synthase [EC:2.3.1.169]
	K15023	Reductive acetyl-CoA pathway (Wood-Ljungdahl pathway)	acsE; 5-methyltetrahydrofolate corrinoid/iron sulfur protein methyltransferase [EC:2.1.1.258]
	K15230	Reductive citrate cycle (rTCA cycle)	aclA; ATP-citrate lyase alpha-subunit [EC:2.3.3.8]
	K15231	Reductive citrate cycle (rTCA cycle)	aclB; ATP-citrate lyase beta-subunit [EC:2.3.3.8]
Methane metabolism	K00200	C1 metabolism/Methanogenesis	fwdA, fmdA; formylmethanofuran dehydrogenase subunit A [EC:1.2.7.12]
	K00201	C1 metabolism/Methanogenesis	fwdB, fmdB; formylmethanofuran dehydrogenase subunit B [EC:1.2.7.12]
	K00202	C1 metabolism/Methanogenesis	fwdC, fmdC; formylmethanofuran dehydrogenase subunit C [EC:1.2.7.12]
	K16157	Methane oxidation	mmoX; methane monooxygenase component A alpha chain [EC:1.14.13.25]
	K16158	Methane oxidation	mmoY; methane monooxygenase component A beta chain [EC:1.14.13.25]
	K16159	Methane oxidation	mmoZ; methane monooxygenase component A gamma chain [EC:1.14.13.25]
	K00399	Methanogenesis	mcrA; methyl-coenzyme M reductase alpha subunit [EC:2.8.4.1]
Nitrogen /Methane metabolism	K10944	Anaerobic ammonia oxidation	pmoA-amoA; methane/ammonia monooxygenase subunit A [EC:1.14.18.3 1.14.99.39]
	K10945	Nitrification|Methane oxidation	pmoB-amoB; methane/ammonia monooxygenase subunit B
	K10946	Nitrification|Methane oxidation	pmoC-amoC; methane/ammonia monooxygenase subunit C
Nitrogen metabolism	K20932	Anaerobic ammonia oxidation	hydrazine synthase subunit [EC:1.7.2.7]
	K00374	Denitrification|Dissimilatory nitrate reduction	narI, narV; nitrate reductase gamma subunit [EC:1.7.5.1 1.7.99.-]
	K02567	Denitrification|Dissimilatory nitrate reduction	napA; periplasmic nitrate reductase NapA [EC:1.7.99.-]
	K02568	Denitrification|Dissimilatory nitrate reduction	napB; cytochrome c-type protein NapB
	K00362	Dissimilatory nitrate reduction (dissimilatory pathway)	nirB; nitrite reductase (NADH) large subunit [EC:1.7.1.15]
	K00363	Dissimilatory nitrate reduction (dissimilatory pathway)	nirD; nitrite reductase (NADH) small subunit [EC:1.7.1.15]
	K00367	Nitrate reduction (assimilatory pathway)	narB; ferredoxin-nitrate reductase [EC:1.7.7.2]
	K00372	Nitrate reduction (assimilatory pathway)	nasA; assimilatory nitrate reductase catalytic subunit [EC:1.7.99.4]
	K10535	Nitrification	hao; hydroxylamine dehydrogenase [EC:1.7.2.6]
	K02588	Nitrogen fixation	nifH; nitrogenase iron protein NifH [EC:1.18.6.1]
Sulfur metabolism	K00380	Assimilatory sulfate reduction (assimilatory pathway)	cysJ; sulfite reductase (NADPH) flavoprotein alpha-component [EC:1.8.1.2]
	K00381	Assimilatory sulfate reduction (assimilatory pathway)	cysI; sulfite reductase (NADPH) hemoprotein beta-component [EC:1.8.1.2]
	K00390	Assimilatory sulfate reduction (assimilatory pathway)	cysH; phosphoadenosine phosphosulfate reductase [EC:1.8.4.8 1.8.4.10]
	K00392	Assimilatory sulfate reduction (assimilatory pathway)	sir; sulfite reductase (ferredoxin) [EC:1.8.7.1]
	K00394	Sulfate reduction (dissimilatory pathway)	aprA; adenylylsulfate reductase, subunit A [EC:1.8.99.2]
	K00395	Sulfate reduction (dissimilatory pathway)	aprB; adenylylsulfate reductase, subunit B [EC:1.8.99.2]
	K11180	Sulfate reduction (dissimilatory pathway)	dsrA; dissimilatory sulfite reductase alpha subunit [EC:1.8.99.5]
	K11181	Sulfate reduction (dissimilatory pathway)	dsrB; dissimilatory sulfite reductase beta subunit [EC:1.8.99.5]
	K17222	Thiosulfate oxidation by SOX complex	soxA
	K17223	Thiosulfate oxidation by SOX complex	soxX
	K17224	Thiosulfate oxidation by SOX complex	soxB
	K17225	Thiosulfate oxidation by SOX complex	soxC
	K17226	Thiosulfate oxidation by SOX complex	soxY
	K17227	Thiosulfate oxidation by SOX complex	soxZ

## Sheet: TABLE S2
Realm	NCBI ID code	Basin	Latitude	Longitude	Depth zone
Benthic	DRR090546	Pacific Ocean	38.498	142.341	Mesopelagic Ocean
Benthic	DRR090547	Pacific Ocean	38.498	142.341	Mesopelagic Ocean
Benthic	DRR090548	Pacific Ocean	38.498	142.341	Mesopelagic Ocean
Benthic	DRR090549	Pacific Ocean	38.498	142.341	Mesopelagic Ocean
Benthic	DRR090550	Pacific Ocean	38.498	142.341	Mesopelagic Ocean
Benthic	DRR090551	Pacific Ocean	38.498	142.341	Mesopelagic Ocean
Benthic	DRR090552	Pacific Ocean	38.498	142.341	Mesopelagic Ocean
Benthic	DRR090553	Pacific Ocean	38.498	142.341	Mesopelagic Ocean
Benthic	DRR090554	Pacific Ocean	38.498	142.341	Mesopelagic Ocean
Benthic	DRR090555	Pacific Ocean	11.7463	142.109	Dark Ocean
Benthic	DRR090556	Pacific Ocean	11.7463	142.109	Dark Ocean
Benthic	DRR090557	Pacific Ocean	11.7463	142.109	Dark Ocean
Benthic	DRR090558	Pacific Ocean	11.7463	142.109	Dark Ocean
Benthic	DRR090559	Pacific Ocean	11.7463	142.109	Dark Ocean
Benthic	DRR090560	Pacific Ocean	11.7463	142.109	Dark Ocean
Benthic	DRR090561	Pacific Ocean	11.7463	142.109	Dark Ocean
Benthic	DRR090562	Pacific Ocean	11.7463	142.109	Dark Ocean
Benthic	DRR090563	Pacific Ocean	11.7463	142.109	Dark Ocean
Benthic	DRR093002	Pacific Ocean	12.93	143.62	Dark Ocean
Benthic	DRR093003	Pacific Ocean	12.93	143.62	Dark Ocean
Benthic	DRR093004	Pacific Ocean	12.93	143.62	Dark Ocean
Benthic	DRR093005	Pacific Ocean	12.93	143.62	Dark Ocean
Benthic	ERR1811624	Atlantic Ocean	51.7972	0.920967	Upper Ocean
Benthic	ERR1811625	Atlantic Ocean	51.7972	0.920967	Upper Ocean
Benthic	ERR1811626	Atlantic Ocean	51.7972	0.920967	Upper Ocean
Benthic	ERR1811627	Atlantic Ocean	51.7968	0.921833	Upper Ocean
Benthic	ERR1811628	Atlantic Ocean	51.7968	0.921833	Upper Ocean
Benthic	ERR1811629	Atlantic Ocean	51.7968	0.921833	Upper Ocean
Benthic	ERR1811630	Atlantic Ocean	51.7972	0.920967	Upper Ocean
Benthic	ERR1811631	Atlantic Ocean	51.7972	0.920967	Upper Ocean
Benthic	ERR1811632	Atlantic Ocean	51.7972	0.920967	Upper Ocean
Benthic	ERR1811633	Atlantic Ocean	51.7968	0.921833	Upper Ocean
Benthic	ERR1811634	Atlantic Ocean	51.7968	0.921833	Upper Ocean
Benthic	ERR1811635	Atlantic Ocean	51.7968	0.921833	Upper Ocean
Benthic	ERR1811636	Atlantic Ocean	51.7865	0.86085	Upper Ocean
Benthic	ERR1811637	Atlantic Ocean	51.7865	0.86085	Upper Ocean
Benthic	ERR1811638	Atlantic Ocean	51.7865	0.86085	Upper Ocean
Benthic	ERR1811639	Atlantic Ocean	51.7878	0.855517	Upper Ocean
Benthic	ERR1811640	Atlantic Ocean	51.7878	0.855517	Upper Ocean
Benthic	ERR1811641	Atlantic Ocean	51.7878	0.855517	Upper Ocean
Benthic	ERR1811642	Atlantic Ocean	51.7865	0.86085	Upper Ocean
Benthic	ERR1811643	Atlantic Ocean	51.7865	0.86085	Upper Ocean
Benthic	ERR1811644	Atlantic Ocean	51.7865	0.86085	Upper Ocean
Benthic	ERR1811645	Atlantic Ocean	51.7878	0.855517	Upper Ocean
Benthic	ERR1811646	Atlantic Ocean	51.7878	0.855517	Upper Ocean
Benthic	ERR1811647	Atlantic Ocean	51.7878	0.855517	Upper Ocean
Benthic	ERR1811648	Atlantic Ocean	51.8302	0.9503	Upper Ocean
Benthic	ERR1811649	Atlantic Ocean	51.8318	0.9687	Upper Ocean
Benthic	ERR1811650	Atlantic Ocean	51.8318	0.9687	Upper Ocean
Benthic	ERR1811651	Atlantic Ocean	51.8302	0.9503	Upper Ocean
Benthic	ERR1811652	Atlantic Ocean	51.8302	0.9503	Upper Ocean
Benthic	ERR1811653	Atlantic Ocean	51.8318	0.9687	Upper Ocean
Benthic	ERR1811654	Atlantic Ocean	51.8318	0.9687	Upper Ocean
Benthic	ERR1811655	Atlantic Ocean	51.8318	0.9687	Upper Ocean
Benthic	ERR1811656	Atlantic Ocean	51.8302	0.9503	Upper Ocean
Benthic	ERR1811657	Atlantic Ocean	51.8302	0.9503	Upper Ocean
Benthic	ERR1811658	Atlantic Ocean	51.7972	0.920967	Upper Ocean
Benthic	ERR1811659	Atlantic Ocean	51.7972	0.920967	Upper Ocean
Benthic	ERR1811660	Atlantic Ocean	51.7968	0.921833	Upper Ocean
Benthic	ERR1811661	Atlantic Ocean	51.7968	0.921833	Upper Ocean
Benthic	ERR1995204	Atlantic Ocean	27.542	-97.286	Upper Ocean
Benthic	ERR1995205	Atlantic Ocean	27.542	-97.286	Upper Ocean
Benthic	ERR1995206	Atlantic Ocean	27.542	-97.286	Upper Ocean
Benthic	ERR2179511	Pacific Ocean	24.33	117.75	Upper Ocean
Benthic	ERR519452	Pacific Ocean	-31.066	154.217	Upper Ocean
Benthic	ERR519453	Pacific Ocean	-29.066	156.217	Upper Ocean
Benthic	ERR519454	Pacific Ocean	-24.066	161.217	Upper Ocean
Benthic	ERR519455	Pacific Ocean	-34.066	151.217	Upper Ocean
Benthic	ERR519456	Pacific Ocean	-25.066	160.217	Upper Ocean
Benthic	ERR519457	Pacific Ocean	-32.066	153.217	Upper Ocean
Benthic	ERR519458	Pacific Ocean	-20.066	165.217	Upper Ocean
Benthic	ERR519459	Pacific Ocean	-28.066	157.217	Upper Ocean
Benthic	ERR519460	Pacific Ocean	-23.066	162.217	Upper Ocean
Benthic	ERR519461	Pacific Ocean	-33.066	152.217	Upper Ocean
Benthic	ERR519462	Pacific Ocean	-27.066	158.217	Upper Ocean
Benthic	ERR519463	Pacific Ocean	-30.066	155.217	Upper Ocean
Benthic	ERR519464	Pacific Ocean	-21.066	164.217	Upper Ocean
Benthic	ERR519465	Pacific Ocean	-22.066	163.217	Upper Ocean
Benthic	ERR519466	Pacific Ocean	-26.066	159.217	Upper Ocean
Benthic	ERR543992	Atlantic Ocean	58.3591	18.1426	Mesopelagic Ocean
Benthic	SRR1555743	Arctic Ocean	73.7632	8.464	Dark Ocean
Benthic	SRR1555744	Arctic Ocean	73.7632	8.464	Dark Ocean
Benthic	SRR1555748	Arctic Ocean	73.7632	8.464	Dark Ocean
Benthic	SRR3223410	Pacific Ocean	27.0119	-111.405	Dark Ocean
Benthic	SRR948505	Atlantic Ocean	41.5758	-70.6392	Upper Ocean
Benthic	SRR948829	Atlantic Ocean	41.5758	-70.6392	Upper Ocean
Pelagic	DRR041863	Pacific Ocean			Upper Ocean
Pelagic	DRR041864	Pacific Ocean			Upper Ocean
Pelagic	DRR053208	Pacific Ocean	34.1928	135.071	Upper Ocean
Pelagic	DRR053209	Pacific Ocean	34.1928	135.071	Upper Ocean
Pelagic	DRR053210	Pacific Ocean	34.1928	135.071	Upper Ocean
Pelagic	DRR053211	Pacific Ocean	34.1928	135.071	Upper Ocean
Pelagic	DRR053212	Pacific Ocean	34.1928	135.071	Upper Ocean
Pelagic	DRR053213	Pacific Ocean	34.1928	135.071	Upper Ocean
Pelagic	DRR053214	Pacific Ocean	34.1928	135.071	Upper Ocean
Pelagic	DRR053215	Pacific Ocean	34.1928	135.071	Upper Ocean
Pelagic	DRR090564	Pacific Ocean	44.0859	155.015	Upper Ocean
Pelagic	DRR090565	Pacific Ocean	44.0859	155.015	Upper Ocean
Pelagic	DRR090566	Pacific Ocean	44.0859	155.015	Upper Ocean
Pelagic	DRR090567	Pacific Ocean	44.0859	155.015	Upper Ocean
Pelagic	DRR090568	Pacific Ocean	44.0859	155.015	Upper Ocean
Pelagic	DRR090569	Pacific Ocean	44.0859	155.015	Upper Ocean
Pelagic	DRR090570	Pacific Ocean	44.0859	155.015	Upper Ocean
Pelagic	DRR090571	Pacific Ocean	44.0859	155.015	Upper Ocean
Pelagic	DRR092705	Pacific Ocean	29.15	142.801	Upper Ocean
Pelagic	DRR092706	Pacific Ocean	29.15	142.801	Mesopelagic Ocean
Pelagic	DRR092707	Pacific Ocean	29.15	142.801	Mesopelagic Ocean
Pelagic	DRR092708	Pacific Ocean	29.15	142.801	Mesopelagic Ocean
Pelagic	DRR092709	Pacific Ocean	29.15	142.801	Dark Ocean
Pelagic	DRR092710	Pacific Ocean	29.15	142.801	Dark Ocean
Pelagic	DRR092711	Pacific Ocean	29.15	142.801	Dark Ocean
Pelagic	DRR092712	Pacific Ocean	29.15	142.801	Dark Ocean
Pelagic	DRR092713	Pacific Ocean	29.15	142.801	Dark Ocean
Pelagic	DRR092714	Pacific Ocean	29.15	142.801	Dark Ocean
Pelagic	DRR092715	Pacific Ocean	36.105	142.726	Upper Ocean
Pelagic	DRR092716	Pacific Ocean	36.064	142.728	Upper Ocean
Pelagic	DRR092717	Pacific Ocean	36.064	142.728	Mesopelagic Ocean
Pelagic	DRR092718	Pacific Ocean	36.064	142.728	Mesopelagic Ocean
Pelagic	DRR092719	Pacific Ocean	36.064	142.728	Dark Ocean
Pelagic	DRR092720	Pacific Ocean	36.105	142.726	Dark Ocean
Pelagic	ERR1078300	Atlantic Ocean	37.504	-31.3194	Mesopelagic Ocean
Pelagic	ERR1078301	Atlantic Ocean	38.504	-30.3194	Mesopelagic Ocean
Pelagic	ERR1078302	Atlantic Ocean	39.504	-29.3194	Mesopelagic Ocean
Pelagic	ERR1078373	Atlantic Ocean	57.6844	11.9646	Upper Ocean
Pelagic	ERR1078374	Atlantic Ocean	57.6844	11.9646	Upper Ocean
Pelagic	ERR1078375	Atlantic Ocean	57.6844	11.9646	Upper Ocean
Pelagic	ERR1078376	Atlantic Ocean	57.6844	11.9646	Upper Ocean
Pelagic	ERR1078377	Atlantic Ocean	57.6844	11.9646	Upper Ocean
Pelagic	ERR1078378	Atlantic Ocean	57.6844	11.9646	Upper Ocean
Pelagic	ERR1078379	Atlantic Ocean	57.6844	11.9646	Upper Ocean
Pelagic	ERR1078380	Atlantic Ocean	57.6844	11.9646	Upper Ocean
Pelagic	ERR1078381	Atlantic Ocean	57.6844	11.9646	Upper Ocean
Pelagic	ERR1078382	Atlantic Ocean	57.6844	11.9646	Upper Ocean
Pelagic	ERR1078383	Atlantic Ocean	57.6844	11.9646	Upper Ocean
Pelagic	ERR1078384	Atlantic Ocean	57.6844	11.9646	Upper Ocean
Pelagic	ERR1163068	Pacific Ocean	45.9332	-130	Dark Ocean
Pelagic	ERR1163069	Pacific Ocean	45.9332	-129.999	Dark Ocean
Pelagic	ERR1163070	Pacific Ocean	45.9332	-130	Dark Ocean
Pelagic	ERR1163071	Pacific Ocean	45.9332	-129.999	Dark Ocean
Pelagic	ERR1163072	Pacific Ocean	45.9332	-130	Dark Ocean
Pelagic	ERR1163073	Pacific Ocean	45.9332	-129.999	Dark Ocean
Pelagic	ERR1163074	Pacific Ocean	45.9332	-129.999	Dark Ocean
Pelagic	ERR1163075	Pacific Ocean	45.9228	-129.99	Dark Ocean
Pelagic	ERR1163082	Pacific Ocean	45.9228	-129.988	Dark Ocean
Pelagic	ERR1163083	Pacific Ocean	45.9228	-129.988	Dark Ocean
Pelagic	ERR1163084	Pacific Ocean	45.9228	-129.988	Dark Ocean
Pelagic	ERR1163085	Pacific Ocean	45.9228	-129.988	Dark Ocean
Pelagic	ERR1163086	Pacific Ocean	45.9228	-129.988	Dark Ocean
Pelagic	ERR1163087	Pacific Ocean	45.9228	-129.988	Dark Ocean
Pelagic	ERR1163088	Pacific Ocean	45.9228	-129.988	Dark Ocean
Pelagic	ERR1163089	Pacific Ocean	45.9228	-129.988	Dark Ocean
Pelagic	ERR1163090	Pacific Ocean	45.9228	-129.988	Dark Ocean
Pelagic	ERR1163091	Pacific Ocean	45.9228	-129.988	Dark Ocean
Pelagic	ERR1163092	Pacific Ocean	45.9228	-129.988	Dark Ocean
Pelagic	ERR1163093	Pacific Ocean	45.9228	-129.988	Dark Ocean
Pelagic	ERR1163094	Pacific Ocean	45.9228	-129.988	Dark Ocean
Pelagic	ERR1163105	Pacific Ocean	45.9332	-130.014	Dark Ocean
Pelagic	ERR1163106	Pacific Ocean	45.9332	-130.014	Dark Ocean
Pelagic	ERR1163107	Pacific Ocean	45.9332	-130.014	Dark Ocean
Pelagic	ERR1163108	Pacific Ocean	45.9332	-130.014	Dark Ocean
Pelagic	ERR1163109	Pacific Ocean	45.9332	-130.014	Dark Ocean
Pelagic	ERR1163110	Pacific Ocean	45.9332	-130.014	Dark Ocean
Pelagic	ERR1163111	Pacific Ocean	45.9332	-130.014	Dark Ocean
Pelagic	ERR1163112	Pacific Ocean	45.9332	-130.014	Dark Ocean
Pelagic	ERR1163113	Pacific Ocean	45.9332	-130.014	Dark Ocean
Pelagic	ERR1163114	Pacific Ocean	45.9332	-130.014	Dark Ocean
Pelagic	ERR1163115	Pacific Ocean	45.9332	-130.014	Dark Ocean
Pelagic	ERR1163116	Pacific Ocean	45.9332	-130.014	Dark Ocean
Pelagic	ERR1163117	Pacific Ocean	45.9332	-130.014	Dark Ocean
Pelagic	ERR1163125	Pacific Ocean	45.9332	-129.982	Dark Ocean
Pelagic	ERR1163126	Pacific Ocean	45.9332	-129.982	Dark Ocean
Pelagic	ERR1163127	Pacific Ocean	45.9332	-129.982	Dark Ocean
Pelagic	ERR1163128	Pacific Ocean	45.9332	-129.982	Dark Ocean
Pelagic	ERR1163129	Pacific Ocean	45.9332	-129.982	Dark Ocean
Pelagic	ERR1163130	Pacific Ocean	45.9332	-129.982	Dark Ocean
Pelagic	ERR1163131	Pacific Ocean	45.9332	-129.982	Dark Ocean
Pelagic	ERR1163132	Pacific Ocean	45.9332	-129.982	Dark Ocean
Pelagic	ERR1163133	Pacific Ocean	45.9332	-129.982	Dark Ocean
Pelagic	ERR1163134	Pacific Ocean	45.9332	-129.982	Dark Ocean
Pelagic	ERR1163135	Pacific Ocean	45.9332	-129.982	Dark Ocean
Pelagic	ERR1212038	Mediterranean Sea	41.6704	2.80017	Upper Ocean
Pelagic	ERR1212039	Mediterranean Sea	41.6704	2.80017	Upper Ocean
Pelagic	ERR1424899	Arctic Ocean	89.9	179.7	Upper Ocean
Pelagic	ERR1424900	Arctic Ocean	73	-158.76	Upper Ocean
Pelagic	ERR1424901	Arctic Ocean	73	-158.76	Upper Ocean
Pelagic	ERR1424902	Arctic Ocean	73	-158.76	Mesopelagic Ocean
Pelagic	ERR1424903	Arctic Ocean	73	-158.76	Upper Ocean
Pelagic	ERR1424904	Arctic Ocean	73	-158.76	Upper Ocean
Pelagic	ERR1424907	Arctic Ocean	72.802	-159.8	Upper Ocean
Pelagic	ERR1424908	Arctic Ocean	72.802	-159.8	Upper Ocean
Pelagic	ERR1424909	Arctic Ocean	72.802	-159.8	Upper Ocean
Pelagic	ERR1424910	Arctic Ocean	72.802	-159.8	Upper Ocean
Pelagic	ERR1579315	Atlantic Ocean	63.433	10.383	Upper Ocean
Pelagic	ERR1579316	Atlantic Ocean	63.433	10.383	Upper Ocean
Pelagic	ERR1579317	Atlantic Ocean	63.433	10.383	Upper Ocean
Pelagic	ERR1579318	Atlantic Ocean	63.433	10.383	Upper Ocean
Pelagic	ERR1579319	Atlantic Ocean	63.433	10.383	Upper Ocean
Pelagic	ERR1679394	Pacific Ocean	-3.79992	152.101	Dark Ocean
Pelagic	ERR1679396	Pacific Ocean	-3.7283	151.673	Dark Ocean
Pelagic	ERR1698980	Atlantic Ocean	29.2806	-94.8517	Upper Ocean
Pelagic	ERR1698987	Atlantic Ocean	28.0862	-97.2005	Upper Ocean
Pelagic	ERR1698991	Atlantic Ocean	27.877	-97.5048	Upper Ocean
Pelagic	ERR1698995	Atlantic Ocean	27.6253	-97.2087	Upper Ocean
Pelagic	ERR1701760	Indian Ocean	18.5839	66.4727	Upper Ocean
Pelagic	ERR1726522	Pacific Ocean	-8.8984	-140.309	Upper Ocean
Pelagic	ERR1726523	Pacific Ocean	14.2075	-116.647	Upper Ocean
Pelagic	ERR1726524	Pacific Ocean	-34.0614	-73.1066	Upper Ocean
Pelagic	ERR1726525	Pacific Ocean	-0.0141	-84.5899	Upper Ocean
Pelagic	ERR1726526	Indian Ocean	18.5568	66.4706	Upper Ocean
Pelagic	ERR1726527	Pacific Ocean	-12.9723	-96.0122	Upper Ocean
Pelagic	ERR1726528	Pacific Ocean	-1.9778	-84.5992	Upper Ocean
Pelagic	ERR1726529	Atlantic Ocean	25.5921	-88.4388	Upper Ocean
Pelagic	ERR1726530	Atlantic Ocean	-44.5838	-52.1952	Upper Ocean
Pelagic	ERR1726531	Indian Ocean	-2.0396	72.1673	Upper Ocean
Pelagic	ERR1726532	Atlantic Ocean	44.0852	-16.5645	Upper Ocean
Pelagic	ERR1726533	Pacific Ocean	-9.1504	-140.522	Upper Ocean
Pelagic	ERR1726534	Atlantic Ocean	31.8103	-64.1348	Upper Ocean
Pelagic	ERR1726535	Pacific Ocean	-23.2811	-129.395	Upper Ocean
Pelagic	ERR1726536	Pacific Ocean	6.4959	-95.0499	Upper Ocean
Pelagic	ERR1726537	Indian Ocean	23.4183	37.245	Upper Ocean
Pelagic	ERR1726538	Indian Ocean	4.6595	73.4888	Upper Ocean
Pelagic	ERR1726539	Pacific Ocean	6.8299	-153.04	Upper Ocean
Pelagic	ERR1726540	Mediterranean Sea	39.8386	17.4155	Upper Ocean
Pelagic	ERR1726541	Pacific Ocean	-25.8073	-111.736	Upper Ocean
Pelagic	ERR1726542	Atlantic Ocean	36.5533	-6.5669	Upper Ocean
Pelagic	ERR1726543	Pacific Ocean	-31.409	-93.9464	Upper Ocean
Pelagic	ERR1726544	Pacific Ocean	-23.1571	-135.018	Upper Ocean
Pelagic	ERR1726546	Mediterranean Sea	39.814	17.4138	Upper Ocean
Pelagic	ERR1726547	Atlantic Ocean	39.194	-70.0499	Upper Ocean
Pelagic	ERR1726548	Atlantic Ocean	34.8217	-71.21	Upper Ocean
Pelagic	ERR1726549	Indian Ocean	17.5294	67.9576	Upper Ocean
Pelagic	ERR1726550	Pacific Ocean	-12.9127	-96.109	Upper Ocean
Pelagic	ERR1726551	Atlantic Ocean	35.8777	-37.1969	Upper Ocean
Pelagic	ERR1726552	Pacific Ocean	-16.9753	-100.675	Upper Ocean
Pelagic	ERR1726553	Atlantic Ocean	43.6825	-16.8412	Upper Ocean
Pelagic	ERR1726554	Indian Ocean	20.8116	63.5128	Upper Ocean
Pelagic	ERR1726555	Mediterranean Sea	35.759	14.2574	Upper Ocean
Pelagic	ERR1726556	Pacific Ocean	-8.9971	-139.196	Upper Ocean
Pelagic	ERR1726557	Mediterranean Sea	39.0862	5.78	Upper Ocean
Pelagic	ERR1726558	Pacific Ocean	-29.6954	-101.19	Upper Ocean
Pelagic	ERR1726559	Pacific Ocean	31.4868	-159.075	Upper Ocean
Pelagic	ERR1726560	Pacific Ocean	6.3356	-103.04	Upper Ocean
Pelagic	ERR1726561	Pacific Ocean	-8.8932	-140.288	Upper Ocean
Pelagic	ERR1726562	Pacific Ocean	0.001	-153.639	Upper Ocean
Pelagic	ERR1726563	Pacific Ocean	2.0218	-84.5652	Upper Ocean
Pelagic	ERR1726564	Pacific Ocean	-9.1504	-140.522	Upper Ocean
Pelagic	ERR1726565	Atlantic Ocean	-21.004	-35.3168	Upper Ocean
Pelagic	ERR1726566	Pacific Ocean	0.0676	-84.6088	Upper Ocean
Pelagic	ERR1726567	Pacific Ocean	-16.9601	-100.633	Upper Ocean
Pelagic	ERR1726568	Indian Ocean	23.41	37.2383	Upper Ocean
Pelagic	ERR1726569	Pacific Ocean	-9.1504	-140.522	Upper Ocean
Pelagic	ERR1726570	Pacific Ocean	31.5168	-159.046	Upper Ocean
Pelagic	ERR1726571	Pacific Ocean	-9.1504	-140.522	Upper Ocean
Pelagic	ERR1726572	Pacific Ocean	-54.3739	-65.1342	Upper Ocean
Pelagic	ERR1726573	Atlantic Ocean	-44.5455	-52.3242	Upper Ocean
Pelagic	ERR1726574	Mediterranean Sea	38.4319	20.189	Upper Ocean
Pelagic	ERR1726575	Indian Ocean	4.6599	73.4856	Upper Ocean
Pelagic	ERR1726576	Pacific Ocean	17.0854	-118.891	Upper Ocean
Pelagic	ERR1726577	Pacific Ocean	0.008	-153.702	Upper Ocean
Pelagic	ERR1726578	Indian Ocean	18.4917	39.8583	Upper Ocean
Pelagic	ERR1726579	Pacific Ocean	-1.9002	-84.6265	Upper Ocean
Pelagic	ERR1726580	Pacific Ocean	31.4901	-159.067	Upper Ocean
Pelagic	ERR1726581	Atlantic Ocean	36.3385	-72.7366	Upper Ocean
Pelagic	ERR1726582	Indian Ocean	17.4814	67.9947	Upper Ocean
Pelagic	ERR1726583	Pacific Ocean	14.1957	-116.729	Upper Ocean
Pelagic	ERR1726584	Pacific Ocean	-16.9587	-100.675	Upper Ocean
Pelagic	ERR1726585	Mediterranean Sea	35.7528	14.2765	Upper Ocean
Pelagic	ERR1726586	Pacific Ocean	-23.1195	-134.899	Upper Ocean
Pelagic	ERR1726587	Indian Ocean	18.5667	66.522	Upper Ocean
Pelagic	ERR1726588	Pacific Ocean	-12.991	-95.9893	Upper Ocean
Pelagic	ERR1726589	Atlantic Ocean	36.1715	-29.023	Upper Ocean
Pelagic	ERR1726590	Indian Ocean	-17.3066	42.2853	Upper Ocean
Pelagic	ERR1726591	Indian Ocean	17.4814	67.9947	Upper Ocean
Pelagic	ERR1726592	Pacific Ocean	-23.2318	-134.928	Upper Ocean
Pelagic	ERR1726594	Pacific Ocean	0.0078	-153.626	Upper Ocean
Pelagic	ERR1726595	Pacific Ocean	22.7281	-158.091	Upper Ocean
Pelagic	ERR1726596	Atlantic Ocean	36.1811	-28.9373	Upper Ocean
Pelagic	ERR1726597	Mediterranean Sea	41.6686	2.7996	Upper Ocean
Pelagic	ERR1726598	Indian Ocean	-28.2025	-107.566	Upper Ocean
Pelagic	ERR1726599	Indian Ocean	6.0019	73.8949	Upper Ocean
Pelagic	ERR1726600	Pacific Ocean	-23.1	-135	Upper Ocean
Pelagic	ERR1726601	Pacific Ocean	-9.1463	-140.515	Upper Ocean
Pelagic	ERR1726602	Atlantic Ocean	-2.0133	-4.589	Upper Ocean
Pelagic	ERR1726603	Pacific Ocean	-25.8162	-111.735	Upper Ocean
Pelagic	ERR1726604	Pacific Ocean	-1.7942	-84.632	Upper Ocean
Pelagic	ERR1726605	Pacific Ocean	-23.1594	-134.924	Upper Ocean
Pelagic	ERR1726606	Pacific Ocean	-8.9748	-139.209	Upper Ocean
Pelagic	ERR1726607	Atlantic Ocean	-21.0716	-35.3964	Upper Ocean
Pelagic	ERR1726608	Pacific Ocean	-9.1508	-140.497	Upper Ocean
Pelagic	ERR1726609	Pacific Ocean	-12.9723	-96.0122	Upper Ocean
Pelagic	ERR1726610	Indian Ocean	23.41	37.2383	Upper Ocean
Pelagic	ERR1726611	Indian Ocean	-2.0461	72.1573	Upper Ocean
Pelagic	ERR1726613	Mediterranean Sea	39.814	17.4138	Upper Ocean
Pelagic	ERR1726614	Indian Ocean	-0.6623	73.1629	Upper Ocean
Pelagic	ERR1726615	Pacific Ocean	-23.1107	-134.933	Upper Ocean
Pelagic	ERR1726616	Pacific Ocean	32.9903	-121.846	Upper Ocean
Pelagic	ERR1726618	Mediterranean Sea	39.3681	19.4206	Upper Ocean
Pelagic	ERR1726619	Pacific Ocean	14.3284	-102.956	Upper Ocean
Pelagic	ERR1726620	Pacific Ocean	-23.2319	-134.962	Upper Ocean
Pelagic	ERR1726621	Pacific Ocean	22.7267	-157.995	Upper Ocean
Pelagic	ERR1726622	Pacific Ocean	-8.9056	-140.279	Upper Ocean
Pelagic	ERR1726623	Pacific Ocean	-12.9127	-96.109	Upper Ocean
Pelagic	ERR1726624	Pacific Ocean	-12.9359	-96.0413	Upper Ocean
Pelagic	ERR1726625	Atlantic Ocean	31.7913	-64.1522	Upper Ocean
Pelagic	ERR1726626	Atlantic Ocean	-20.9724	-35.2724	Upper Ocean
Pelagic	ERR1726627	Pacific Ocean	-33.9368	-73.0606	Upper Ocean
Pelagic	ERR1726628	Pacific Ocean	-5.2529	-85.1545	Upper Ocean
Pelagic	ERR1726629	Atlantic Ocean	43.7056	-16.8794	Upper Ocean
Pelagic	ERR1726630	Atlantic Ocean	-31.0292	4.6742	Upper Ocean
Pelagic	ERR1726631	Pacific Ocean	-12.9794	-96.0232	Upper Ocean
Pelagic	ERR1726632	Pacific Ocean	-33.6737	-71.9641	Upper Ocean
Pelagic	ERR1726633	Indian Ocean	5.9998	73.9067	Upper Ocean
Pelagic	ERR1726634	Pacific Ocean	-13.0023	-95.9759	Upper Ocean
Pelagic	ERR1726635	Atlantic Ocean	43.6904	-16.8544	Upper Ocean
Pelagic	ERR1726636	Atlantic Ocean	-40.6297	-52.0503	Upper Ocean
Pelagic	ERR1726637	Pacific Ocean	6.6433	-153.084	Upper Ocean
Pelagic	ERR1726638	Atlantic Ocean	29.6757	-79.6016	Upper Ocean
Pelagic	ERR1726639	Pacific Ocean	-12.991	-95.9893	Upper Ocean
Pelagic	ERR1726640	Pacific Ocean	22.7091	-158.025	Upper Ocean
Pelagic	ERR1726641	Pacific Ocean	32.9909	-121.852	Upper Ocean
Pelagic	ERR1726642	Mediterranean Sea	43.5943	7.3321	Upper Ocean
Pelagic	ERR1726643	Pacific Ocean	-8.9111	-142.557	Upper Ocean
Pelagic	ERR1726644	Indian Ocean	4.66	73.4856	Upper Ocean
Pelagic	ERR1726645	Pacific Ocean	-33.6895	-71.998	Upper Ocean
Pelagic	ERR1726646	Indian Ocean	0.0023	71.6311	Upper Ocean
Pelagic	ERR1726647	Pacific Ocean	6.6261	-153.07	Upper Ocean
Pelagic	ERR1726648	Atlantic Ocean	-40.6083	-51.9557	Upper Ocean
Pelagic	ERR1726649	Indian Ocean	-29.5018	37.9887	Upper Ocean
Pelagic	ERR1726650	Pacific Ocean	6.3374	-103.084	Upper Ocean
Pelagic	ERR1726651	Pacific Ocean	-21.4994	54.3486	Upper Ocean
Pelagic	ERR1726652	Indian Ocean	14.5741	69.9988	Upper Ocean
Pelagic	ERR1726653	Atlantic Ocean	44.074	-16.547	Upper Ocean
Pelagic	ERR1726654	Atlantic Ocean	36.3422	-72.7462	Upper Ocean
Pelagic	ERR1726655	Pacific Ocean	-12.9119	-96.1101	Upper Ocean
Pelagic	ERR1726656	Pacific Ocean	-13.0023	-95.9759	Upper Ocean
Pelagic	ERR1726657	Pacific Ocean	-9.1508	-140.497	Upper Ocean
Pelagic	ERR1726658	Pacific Ocean	2.0361	-84.5565	Upper Ocean
Pelagic	ERR1726659	Pacific Ocean	-5.2686	-85.248	Upper Ocean
Pelagic	ERR1726660	Mediterranean Sea	34.4933	14.9133	Upper Ocean
Pelagic	ERR1726661	Pacific Ocean	6.48	-95.0153	Upper Ocean
Pelagic	ERR1726662	Mediterranean Sea	39.0856	5.7927	Upper Ocean
Pelagic	ERR1726663	Atlantic Ocean	-34.8986	18.03	Upper Ocean
Pelagic	ERR1726664	Pacific Ocean	-23.2	-134.9	Upper Ocean
Pelagic	ERR1726665	Pacific Ocean	-21.4689	54.3066	Upper Ocean
Pelagic	ERR1726666	Pacific Ocean	-8.894	-142.631	Upper Ocean
Pelagic	ERR1726667	Pacific Ocean	-8.9971	-139.196	Upper Ocean
Pelagic	ERR1726668	Pacific Ocean	-1.9002	-84.6265	Upper Ocean
Pelagic	ERR1726669	Pacific Ocean	14.1853	-116.684	Upper Ocean
Pelagic	ERR1726670	Pacific Ocean	-16.9581	-100.659	Upper Ocean
Pelagic	ERR1726671	Pacific Ocean	-21.4689	54.3066	Upper Ocean
Pelagic	ERR1726672	Pacific Ocean	2.0361	-84.5565	Upper Ocean
Pelagic	ERR1726673	Mediterranean Sea	38.4735	20.1718	Upper Ocean
Pelagic	ERR1726674	Indian Ocean	-17.5705	42.2769	Upper Ocean
Pelagic	ERR1726675	Mediterranean Sea	42.456	17.9393	Upper Ocean
Pelagic	ERR1726676	Atlantic Ocean	25.5264	-88.394	Upper Ocean
Pelagic	ERR1726677	Indian Ocean	-17.4962	42.2173	Upper Ocean
Pelagic	ERR1726678	Atlantic Ocean	-20.9424	-35.2027	Upper Ocean
Pelagic	ERR1726679	Atlantic Ocean	33.061	-66.5435	Upper Ocean
Pelagic	ERR1726680	Pacific Ocean	32.9909	-121.852	Upper Ocean
Pelagic	ERR1726681	Mediterranean Sea	39.0856	5.7927	Upper Ocean
Pelagic	ERR1726682	Atlantic Ocean	-21.0292	-35.3498	Upper Ocean
Pelagic	ERR1726683	Southern Ocean	-64.3327	-53.0731	Upper Ocean
Pelagic	ERR1726684	Atlantic Ocean	29.8103	-79.668	Upper Ocean
Pelagic	ERR1726685	Pacific Ocean	-23.1594	-134.924	Upper Ocean
Pelagic	ERR1726686	Indian Ocean	18.5584	66.4725	Upper Ocean
Pelagic	ERR1726687	Pacific Ocean	11.2521	-152.454	Upper Ocean
Pelagic	ERR1726688	Pacific Ocean	-8.996	-139.281	Upper Ocean
Pelagic	ERR1726689	Atlantic Ocean	-34.9363	17.9366	Upper Ocean
Pelagic	ERR1726690	Pacific Ocean	-16.9763	-100.679	Upper Ocean
Pelagic	ERR1726691	Pacific Ocean	-8.9124	-142.56	Upper Ocean
Pelagic	ERR1726692	Pacific Ocean	14.1927	-116.647	Upper Ocean
Pelagic	ERR1726693	Atlantic Ocean	39.2305	-70.0377	Upper Ocean
Pelagic	ERR1726694	Pacific Ocean	-23.2545	-129.446	Upper Ocean
Pelagic	ERR1726695	Pacific Ocean	-8.894	-142.631	Upper Ocean
Pelagic	ERR1726696	Indian Ocean	5.9997	73.9002	Upper Ocean
Pelagic	ERR1726697	Pacific Ocean	-21.4593	54.3041	Upper Ocean
Pelagic	ERR1726698	Pacific Ocean	-12.9127	-96.109	Upper Ocean
Pelagic	ERR1726699	Atlantic Ocean	-20.9354	-35.1803	Upper Ocean
Pelagic	ERR1726700	Pacific Ocean	-8.9748	-39.2091	Upper Ocean
Pelagic	ERR1726701	Atlantic Ocean	-34.8901	18.0459	Upper Ocean
Pelagic	ERR1726702	Pacific Ocean	33.0007	-121.87	Upper Ocean
Pelagic	ERR1726703	Atlantic Ocean	32.9701	-66.5548	Upper Ocean
Pelagic	ERR1726704	Atlantic Ocean	-34.8901	18.0459	Upper Ocean
Pelagic	ERR1726705	Pacific Ocean	-5.2537	-85.2221	Upper Ocean
Pelagic	ERR1726706	Atlantic Ocean	-44.5582	-52.2718	Upper Ocean
Pelagic	ERR1726708	Pacific Ocean	-16.9601	-100.633	Upper Ocean
Pelagic	ERR1726709	Pacific Ocean	-5.2514	-85.1696	Upper Ocean
Pelagic	ERR1726710	Pacific Ocean	-25.8208	-11.7468	Upper Ocean
Pelagic	ERR1726711	Indian Ocean	22.0917	38.205	Upper Ocean
Pelagic	ERR1726712	Atlantic Ocean	36.1592	-29.0114	Upper Ocean
Pelagic	ERR1726713	Pacific Ocean	0.0247	-84.6024	Upper Ocean
Pelagic	ERR1726714	Pacific Ocean	-8.9111	-142.557	Upper Ocean
Pelagic	ERR1726715	Mediterranean Sea	39.5705	17.4101	Upper Ocean
Pelagic	ERR1726716	Pacific Ocean	-29.646	-101.292	Upper Ocean
Pelagic	ERR1726717	Pacific Ocean	-8.9543	-139.26	Upper Ocean
Pelagic	ERR1726718	Mediterranean Sea	39.8607	17.4105	Upper Ocean
Pelagic	ERR1726719	Pacific Ocean	-34.0614	-73.1066	Upper Ocean
Pelagic	ERR1726720	Atlantic Ocean	32.9997	-66.5655	Upper Ocean
Pelagic	ERR1726721	Pacific Ocean	-8.9056	-140.279	Upper Ocean
Pelagic	ERR1726722	Mediterranean Sea	39.3888	19.3905	Upper Ocean
Pelagic	ERR1726723	Pacific Ocean	17.0149	-118.917	Upper Ocean
Pelagic	ERR1726724	Pacific Ocean	22.7901	-157.944	Upper Ocean
Pelagic	ERR1726725	Pacific Ocean	-9.1504	-140.522	Upper Ocean
Pelagic	ERR1726726	Pacific Ocean	-21.4752	54.3236	Upper Ocean
Pelagic	ERR1726727	Pacific Ocean	0.0396	-153.807	Upper Ocean
Pelagic	ERR1726729	Indian Ocean	-0.6625	73.1611	Upper Ocean
Pelagic	ERR1726730	Pacific Ocean	6.4998	-94.9527	Upper Ocean
Pelagic	ERR1726731	Atlantic Ocean	-20.9514	-35.2273	Upper Ocean
Pelagic	ERR1726732	Pacific Ocean	-2.0133	-84.589	Upper Ocean
Pelagic	ERR1726733	Atlantic Ocean	-40.6511	-52.182	Upper Ocean
Pelagic	ERR1726734	Pacific Ocean	0.2191	71.8511	Upper Ocean
Pelagic	ERR1726735	Pacific Ocean	-25.8051	-111.72	Upper Ocean
Pelagic	ERR1726736	Indian Ocean	19.0235	64.5256	Upper Ocean
Pelagic	ERR1726738	Pacific Ocean	14.2004	-116.64	Upper Ocean
Pelagic	ERR1726739	Pacific Ocean	-1.9344	-84.6121	Upper Ocean
Pelagic	ERR1726740	Pacific Ocean	0.0561	-84.6261	Upper Ocean
Pelagic	ERR1726741	Pacific Ocean	-23.1571	-135.018	Upper Ocean
Pelagic	ERR1726742	Pacific Ocean	-5.2669	-85.2732	Upper Ocean
Pelagic	ERR1726743	Mediterranean Sea	39.8661	17.3868	Upper Ocean
Pelagic	ERR1726744	Atlantic Ocean	36.15	-28.9989	Upper Ocean
Pelagic	ERR1726745	Pacific Ocean	-8.892	-142.636	Upper Ocean
Pelagic	ERR1726746	Indian Ocean	14.5524	70.013	Upper Ocean
Pelagic	ERR1726747	Pacific Ocean	33.0093	-121.755	Upper Ocean
Pelagic	ERR1726748	Mediterranean Sea	35.7405	14.3238	Upper Ocean
Pelagic	ERR1726749	Pacific Ocean	-33.6895	-71.998	Upper Ocean
Pelagic	ERR1726750	Pacific Ocean	33.02	-121.741	Upper Ocean
Pelagic	ERR1726751	Indian Ocean	27.1517	34.8233	Upper Ocean
Pelagic	ERR1726752	Indian Ocean	27.145	34.8067	Upper Ocean
Pelagic	ERR1726753	Mediterranean Sea	35.7528	14.2765	Upper Ocean
Pelagic	ERR1726754	Indian Ocean	14.5644	70.0096	Upper Ocean
Pelagic	ERR1726755	Pacific Ocean	-12.991	-95.9893	Upper Ocean
Pelagic	ERR1726756	Atlantic Ocean	44.0497	-16.6034	Upper Ocean
Pelagic	ERR1726757	Atlantic Ocean	34.7942	-71.2229	Upper Ocean
Pelagic	ERR1726759	Mediterranean Sea	42.4593	17.9644	Upper Ocean
Pelagic	ERR1726760	Pacific Ocean	2.0299	-84.5546	Upper Ocean
Pelagic	ERR1726761	Atlantic Ocean	43.7056	-16.8794	Upper Ocean
Pelagic	ERR1726762	Pacific Ocean	-8.9068	-140.283	Upper Ocean
Pelagic	ERR1726763	Pacific Ocean	-9.1515	-140.516	Upper Ocean
Pelagic	ERR1726764	Atlantic Ocean	34.7726	-71.2361	Upper Ocean
Pelagic	ERR1726765	Pacific Ocean	-8.892	-142.636	Upper Ocean
Pelagic	ERR1726766	Pacific Ocean	2.0574	-84.5546	Upper Ocean
Pelagic	ERR1726768	Atlantic Ocean	25.5877	-88.4275	Upper Ocean
Pelagic	ERR1726769	Pacific Ocean	31.4794	-159.09	Upper Ocean
Pelagic	ERR1726770	Pacific Ocean	-8.8857	-140.294	Upper Ocean
Pelagic	ERR1726771	Pacific Ocean	-16.9587	-100.675	Upper Ocean
Pelagic	ERR1726772	Atlantic Ocean	34.0533	-49.8355	Upper Ocean
Pelagic	ERR1726773	Pacific Ocean	-1.9002	-84.6265	Upper Ocean
Pelagic	ERR1726774	Pacific Ocean	-57.7558	-67.0324	Upper Ocean
Pelagic	ERR1726775	Pacific Ocean	-1.9389	-84.611	Upper Ocean
Pelagic	ERR1726776	Pacific Ocean	17.0724	-118.897	Upper Ocean
Pelagic	ERR1726777	Indian Ocean	18.3967	39.8767	Upper Ocean
Pelagic	ERR1726778	Pacific Ocean	-23.2488	-129.461	Upper Ocean
Pelagic	ERR1726779	Pacific Ocean	-31.3727	-93.9387	Upper Ocean
Pelagic	ERR1726780	Atlantic Ocean	-21.092	-35.417	Upper Ocean
Pelagic	ERR1726781	Southern Ocean	-64.3373	-52.9847	Upper Ocean
Pelagic	ERR1726782	Pacific Ocean	31.5024	-159.039	Upper Ocean
Pelagic	ERR1726783	Atlantic Ocean	35.7867	-37.0916	Upper Ocean
Pelagic	ERR1726784	Indian Ocean	-0.6625	73.161	Upper Ocean
Pelagic	ERR1726785	Pacific Ocean	-23.1571	-135.031	Upper Ocean
Pelagic	ERR1726786	Mediterranean Sea	34.4064	15.043	Upper Ocean
Pelagic	ERR1726787	Mediterranean Sea	39.2143	19.406	Upper Ocean
Pelagic	ERR1726788	Pacific Ocean	1.9958	-84.576	Upper Ocean
Pelagic	ERR1726789	Pacific Ocean	2.0574	-84.5546	Upper Ocean
Pelagic	ERR1726790	Pacific Ocean	-33.688	-71.9903	Upper Ocean
Pelagic	ERR1726791	Mediterranean Sea	41.6663	2.7994	Upper Ocean
Pelagic	ERR1726792	Pacific Ocean	2.0399	-84.5599	Upper Ocean
Pelagic	ERR1726793	Atlantic Ocean	-34.8901	18.0459	Upper Ocean
Pelagic	ERR1726794	Indian Ocean	20.8215	63.512	Upper Ocean
Pelagic	ERR1726795	Pacific Ocean	0.0193	-153.749	Upper Ocean
Pelagic	ERR1726796	Pacific Ocean	14.1992	-116.713	Upper Ocean
Pelagic	ERR1726797	Pacific Ocean	17.0724	-118.897	Upper Ocean
Pelagic	ERR1726798	Indian Ocean	-17.3368	42.2865	Upper Ocean
Pelagic	ERR1726799	Pacific Ocean	-57.7739	-66.9698	Upper Ocean
Pelagic	ERR1726800	Indian Ocean	-35.2351	26.3022	Upper Ocean
Pelagic	ERR1726801	Pacific Ocean	1.9958	-84.576	Upper Ocean
Pelagic	ERR1726802	Mediterranean Sea	39.8346	17.3934	Upper Ocean
Pelagic	ERR1726803	Atlantic Ocean	44.0722	-16.4987	Upper Ocean
Pelagic	ERR1726804	Indian Ocean	14.5524	70.0113	Upper Ocean
Pelagic	ERR1726805	Pacific Ocean	6.671	-153.066	Upper Ocean
Pelagic	ERR1726806	Pacific Ocean	-29.6222	-101.375	Upper Ocean
Pelagic	ERR1726807	Pacific Ocean	1.9928	-84.5766	Upper Ocean
Pelagic	ERR1726808	Indian Ocean	-16.9672	53.9337	Upper Ocean
Pelagic	ERR1726809	Indian Ocean	20.8215	63.512	Upper Ocean
Pelagic	ERR1726810	Mediterranean Sea	39.8346	17.3934	Upper Ocean
Pelagic	ERR1726811	Mediterranean Sea	35.7528	14.2765	Upper Ocean
Pelagic	ERR1726812	Southern Ocean	-64.3369	-53.1308	Upper Ocean
Pelagic	ERR1726813	Pacific Ocean	-21.4836	54.3312	Upper Ocean
Pelagic	ERR1726814	Indian Ocean	4.661	73.4918	Upper Ocean
Pelagic	ERR1726815	Pacific Ocean	-29.668	-101.228	Upper Ocean
Pelagic	ERR1726816	Pacific Ocean	31.5213	-158.996	Upper Ocean
Pelagic	ERR1726817	Atlantic Ocean	35.9346	-37.3032	Upper Ocean
Pelagic	ERR1726818	Pacific Ocean	31.5191	-159.043	Upper Ocean
Pelagic	ERR1726819	Atlantic Ocean	-40.6487	-52.1511	Upper Ocean
Pelagic	ERR1726820	Indian Ocean	14.5741	69.9988	Upper Ocean
Pelagic	ERR1726821	Atlantic Ocean	44.0497	-16.6034	Upper Ocean
Pelagic	ERR1726822	Pacific Ocean	-8.9124	-142.56	Upper Ocean
Pelagic	ERR1726823	Pacific Ocean	22.7511	-157.963	Upper Ocean
Pelagic	ERR1726824	Atlantic Ocean	36.1781	-28.952	Upper Ocean
Pelagic	ERR1726825	Atlantic Ocean	-30.1415	-43.2475	Upper Ocean
Pelagic	ERR1726826	Pacific Ocean	-8.9502	-139.256	Upper Ocean
Pelagic	ERR1726827	Atlantic Ocean	36.5533	-6.5669	Upper Ocean
Pelagic	ERR1726828	Pacific Ocean	0.0307	-84.612	Upper Ocean
Pelagic	ERR1726829	Atlantic Ocean	-34.8901	18.0459	Upper Ocean
Pelagic	ERR1726830	Pacific Ocean	0.1069	-84.6236	Upper Ocean
Pelagic	ERR1726831	Atlantic Ocean	33.0075	-66.5476	Upper Ocean
Pelagic	ERR1726832	Indian Ocean	5.9994	73.8978	Upper Ocean
Pelagic	ERR1726833	Atlantic Ocean	-34.8901	18.0459	Upper Ocean
Pelagic	ERR1726834	Pacific Ocean	-23.2166	-129.623	Upper Ocean
Pelagic	ERR1726835	Atlantic Ocean	36.3698	-72.9669	Upper Ocean
Pelagic	ERR1726836	Mediterranean Sea	39.8661	17.3868	Upper Ocean
Pelagic	ERR1726837	Pacific Ocean	31.471	-159.101	Upper Ocean
Pelagic	ERR1726838	Indian Ocean	23.36	37.2183	Upper Ocean
Pelagic	ERR1726839	Mediterranean Sea	39.0862	5.78	Upper Ocean
Pelagic	ERR1726840	Indian Ocean	18.4	39.86	Upper Ocean
Pelagic	ERR1726841	Pacific Ocean	-5.252	-85.2052	Upper Ocean
Pelagic	ERR1726842	Pacific Ocean	-5.2669	-85.2732	Upper Ocean
Pelagic	ERR1726843	Indian Ocean	20.8052	63.513	Upper Ocean
Pelagic	ERR1726844	Indian Ocean	14.6067	69.9775	Upper Ocean
Pelagic	ERR1726845	Pacific Ocean	22.7901	-157.944	Upper Ocean
Pelagic	ERR1726846	Pacific Ocean	-8.9111	-142.557	Upper Ocean
Pelagic	ERR1726847	Atlantic Ocean	36.1399	-28.9689	Upper Ocean
Pelagic	ERR1726848	Pacific Ocean	32.931	-121.865	Upper Ocean
Pelagic	ERR1726849	Pacific Ocean	31.4868	-159.075	Upper Ocean
Pelagic	ERR1726850	Pacific Ocean	-33.6771	-71.9719	Upper Ocean
Pelagic	ERR1726851	Pacific Ocean	0.0003	-153.676	Upper Ocean
Pelagic	ERR1726852	Atlantic Ocean	35.8605	-37.178	Upper Ocean
Pelagic	ERR1726853	Atlantic Ocean	-44.6241	-52.1505	Upper Ocean
Pelagic	ERR1726854	Pacific Ocean	-21.5043	54.3563	Upper Ocean
Pelagic	ERR1726855	Mediterranean Sea	39.4046	19.3886	Upper Ocean
Pelagic	ERR1726856	Pacific Ocean	2.0299	-84.5546	Upper Ocean
Pelagic	ERR1726857	Pacific Ocean	-23.2229	-134.961	Upper Ocean
Pelagic	ERR1726858	Pacific Ocean	0.0222	-153.686	Upper Ocean
Pelagic	ERR1726859	Atlantic Ocean	35.9167	-37.2761	Upper Ocean
Pelagic	ERR1726860	Atlantic Ocean	35.8913	-37.2369	Upper Ocean
Pelagic	ERR1726861	Atlantic Ocean	43.6858	-16.8474	Upper Ocean
Pelagic	ERR1726862	Indian Ocean	17.4854	67.9861	Upper Ocean
Pelagic	ERR1726863	Atlantic Ocean	31.6948	-64.2489	Upper Ocean
Pelagic	ERR1726864	Pacific Ocean	14.2035	-116.626	Upper Ocean
Pelagic	ERR1726865	Pacific Ocean	-12.9488	-96.0293	Upper Ocean
Pelagic	ERR1726866	Atlantic Ocean	-34.8901	18.0459	Upper Ocean
Pelagic	ERR1726867	Atlantic Ocean	34.0639	-49.844	Upper Ocean
Pelagic	ERR1726868	Indian Ocean	19.0172	64.6168	Upper Ocean
Pelagic	ERR1726869	Pacific Ocean	33.0339	-121.878	Mesopelagic Ocean
Pelagic	ERR1726870	Mediterranean Sea	39.91	12.8266	Upper Ocean
Pelagic	ERR1726871	Pacific Ocean	2.0399	-84.5599	Upper Ocean
Pelagic	ERR1726872	Pacific Ocean	31.4901	-159.067	Upper Ocean
Pelagic	ERR1726873	Pacific Ocean	17.0552	-118.901	Upper Ocean
Pelagic	ERR1726875	Atlantic Ocean	-34.8901	18.0459	Upper Ocean
Pelagic	ERR1726876	Pacific Ocean	-34.0374	-73.09	Upper Ocean
Pelagic	ERR1726877	Atlantic Ocean	33.0096	-66.547	Upper Ocean
Pelagic	ERR1726878	Pacific Ocean	-34.0614	-73.1066	Upper Ocean
Pelagic	ERR1726879	Mediterranean Sea	41.6666	2.7962	Upper Ocean
Pelagic	ERR1726880	Indian Ocean	-28.186	-107.623	Upper Ocean
Pelagic	ERR1726881	Atlantic Ocean	-44.5342	-52.455	Upper Ocean
Pelagic	ERR1726882	Pacific Ocean	-16.9753	-100.675	Upper Ocean
Pelagic	ERR1726883	Pacific Ocean	-8.9948	-139.217	Upper Ocean
Pelagic	ERR1726884	Pacific Ocean	32.9986	-121.77	Upper Ocean
Pelagic	ERR1726885	Atlantic Ocean	39.2214	-70.0322	Upper Ocean
Pelagic	ERR1726886	Pacific Ocean	6.4808	-94.9704	Upper Ocean
Pelagic	ERR1726887	Mediterranean Sea	36.5158	-3.9942	Upper Ocean
Pelagic	ERR1726888	Pacific Ocean	33.0007	-121.87	Upper Ocean
Pelagic	ERR1726889	Atlantic Ocean	31.7432	-64.1967	Upper Ocean
Pelagic	ERR1726890	Pacific Ocean	-2.0133	-84.589	Upper Ocean
Pelagic	ERR1726891	Pacific Ocean	-8.9948	-139.217	Upper Ocean
Pelagic	ERR1726892	Pacific Ocean	-9.1463	-140.515	Upper Ocean
Pelagic	ERR1726893	Atlantic Ocean	29.7902	-79.6437	Upper Ocean
Pelagic	ERR1726894	Pacific Ocean	6.8381	-153.106	Upper Ocean
Pelagic	ERR1726895	Pacific Ocean	-33.688	-71.9903	Upper Ocean
Pelagic	ERR1726896	Pacific Ocean	-25.8051	-111.72	Upper Ocean
Pelagic	ERR1726897	Indian Ocean	-2.0465	72.1568	Upper Ocean
Pelagic	ERR1726898	Atlantic Ocean	-34.8901	18.0459	Upper Ocean
Pelagic	ERR1726899	Atlantic Ocean	-20.392	-3.2158	Upper Ocean
Pelagic	ERR1726900	Pacific Ocean	-25.8208	-111.747	Upper Ocean
Pelagic	ERR1726901	Southern Ocean	-64.3373	-52.9847	Upper Ocean
Pelagic	ERR1726902	Indian Ocean	21.9467	38.2517	Upper Ocean
Pelagic	ERR1726903	Pacific Ocean	-8.894	-142.631	Upper Ocean
Pelagic	ERR1726904	Pacific Ocean	2.0299	-84.5546	Upper Ocean
Pelagic	ERR1726905	Pacific Ocean	-25.859	-111.699	Upper Ocean
Pelagic	ERR1726906	Atlantic Ocean	-40.6241	-51.9229	Upper Ocean
Pelagic	ERR1726907	Pacific Ocean	-2.0133	-84.589	Upper Ocean
Pelagic	ERR1726908	Indian Ocean	17.4847	67.9997	Upper Ocean
Pelagic	ERR1726909	Pacific Ocean	-12.9359	-96.0413	Upper Ocean
Pelagic	ERR1726910	Indian Ocean	18.4417	39.8567	Upper Ocean
Pelagic	ERR1726911	Atlantic Ocean	36.1764	-29.9734	Upper Ocean
Pelagic	ERR1726912	Pacific Ocean	-8.9124	-142.56	Upper Ocean
Pelagic	ERR1726913	Pacific Ocean	-8.9068	-140.283	Upper Ocean
Pelagic	ERR1726914	Pacific Ocean	22.7598	-157.957	Upper Ocean
Pelagic	ERR1726915	Indian Ocean	18.5745	66.4895	Upper Ocean
Pelagic	ERR1726916	Pacific Ocean	-16.9554	-100.691	Upper Ocean
Pelagic	ERR1726917	Indian Ocean	23.3733	37.2167	Upper Ocean
Pelagic	ERR1726918	Indian Ocean	21.9467	38.2517	Upper Ocean
Pelagic	ERR1726920	Indian Ocean	20.807	63.513	Upper Ocean
Pelagic	ERR1726921	Pacific Ocean	-21.5043	54.3563	Upper Ocean
Pelagic	ERR1726922	Pacific Ocean	-8.957	-139.242	Upper Ocean
Pelagic	ERR1726923	Pacific Ocean	33.008	-121.758	Upper Ocean
Pelagic	ERR1726924	Pacific Ocean	22.7091	-158.025	Upper Ocean
Pelagic	ERR1726925	Indian Ocean	14.5644	70.0096	Upper Ocean
Pelagic	ERR1726926	Indian Ocean	22.0917	38.205	Upper Ocean
Pelagic	ERR1726927	Pacific Ocean	-9.006	-139.206	Upper Ocean
Pelagic	ERR1726928	Pacific Ocean	-54.3826	-65.051	Upper Ocean
Pelagic	ERR1726929	Mediterranean Sea	39.8386	17.4155	Upper Ocean
Pelagic	ERR1726930	Pacific Ocean	32.9916	-121.854	Upper Ocean
Pelagic	ERR1726931	Pacific Ocean	-23.2	-134.9	Upper Ocean
Pelagic	ERR1726932	Pacific Ocean	-9.006	-139.206	Upper Ocean
Pelagic	ERR1726933	Pacific Ocean	1.9928	-84.5766	Upper Ocean
Pelagic	ERR1726934	Indian Ocean	6.0098	74.0607	Upper Ocean
Pelagic	ERR1726935	Pacific Ocean	6.7379	-153.081	Upper Ocean
Pelagic	ERR1726936	Mediterranean Sea	36.0322	-4.4493	Upper Ocean
Pelagic	ERR1726937	Atlantic Ocean	-20.955	-35.2366	Upper Ocean
Pelagic	ERR1726938	Pacific Ocean	-8.996	-139.281	Upper Ocean
Pelagic	ERR1726939	Southern Ocean	-64.358	-53.0534	Upper Ocean
Pelagic	ERR1726940	Indian Ocean	17.4825	67.9869	Upper Ocean
Pelagic	ERR1726941	Atlantic Ocean	44.0722	-16.4987	Upper Ocean
Pelagic	ERR1726942	Indian Ocean	27.155	34.83	Upper Ocean
Pelagic	ERR1726943	Pacific Ocean	-29.6597	-101.235	Upper Ocean
Pelagic	ERR1726944	Atlantic Ocean	25.546	-88.4282	Upper Ocean
Pelagic	ERR1726945	Pacific Ocean	2.0361	-84.5565	Upper Ocean
Pelagic	ERR1726946	Pacific Ocean	-8.8899	-142.649	Upper Ocean
Pelagic	ERR1726948	Pacific Ocean	6.3168	-102.96	Upper Ocean
Pelagic	ERR1726949	Atlantic Ocean	34.094	-49.8586	Upper Ocean
Pelagic	ERR1726950	Pacific Ocean	6.3168	-102.96	Upper Ocean
Pelagic	ERR1726951	Indian Ocean	20.8183	63.5047	Upper Ocean
Pelagic	ERR1726952	Pacific Ocean	-34.0614	-73.1066	Upper Ocean
Pelagic	ERR1726953	Mediterranean Sea	41.6666	2.7962	Upper Ocean
Pelagic	ERR1726955	Pacific Ocean	1.9928	-84.5766	Upper Ocean
Pelagic	ERR1726956	Pacific Ocean	6.3199	-102.96	Upper Ocean
Pelagic	ERR1726957	Pacific Ocean	6.3168	-102.96	Upper Ocean
Pelagic	ERR1726958	Atlantic Ocean	-44.6474	-52.1308	Upper Ocean
Pelagic	ERR1726959	Pacific Ocean	-8.9543	-139.26	Upper Ocean
Pelagic	ERR1726960	Indian Ocean	18.4183	39.865	Upper Ocean
Pelagic	ERR1726961	Pacific Ocean	-8.8984	-140.309	Upper Ocean
Pelagic	ERR1726962	Pacific Ocean	6.3199	-102.96	Upper Ocean
Pelagic	ERR1726963	Pacific Ocean	-31.4424	-93.9597	Upper Ocean
Pelagic	ERR1726964	Pacific Ocean	2.0218	-84.5652	Upper Ocean
Pelagic	ERR1726965	Mediterranean Sea	35.7528	14.2765	Upper Ocean
Pelagic	ERR1726967	Pacific Ocean	6.3199	-102.96	Upper Ocean
Pelagic	ERR1726968	Southern Ocean	-64.358	-53.0534	Upper Ocean
Pelagic	ERR1726969	Atlantic Ocean	-20.4107	-3.1775	Upper Ocean
Pelagic	ERR1726970	Pacific Ocean	-25.8105	-111.733	Upper Ocean
Pelagic	ERR1726971	Atlantic Ocean	39.2077	-70.034	Upper Ocean
Pelagic	ERR1726973	Atlantic Ocean	35.8641	-37.1831	Upper Ocean
Pelagic	ERR1726974	Indian Ocean	0.0033	71.6428	Upper Ocean
Pelagic	ERR1726975	Atlantic Ocean	-8.7789	-17.9099	Upper Ocean
Pelagic	ERR1726976	Mediterranean Sea	39.3885	19.3906	Upper Ocean
Pelagic	ERR1726977	Pacific Ocean	-23.2142	-129.631	Upper Ocean
Pelagic	ERR1726978	Pacific Ocean	-16.9581	53.9809	Upper Ocean
Pelagic	ERR1726979	Indian Ocean	18.5667	66.522	Upper Ocean
Pelagic	ERR1726980	Atlantic Ocean	43.6792	-16.8344	Upper Ocean
Pelagic	ERR1740324	Atlantic Ocean	-30.1484	-43.2705	Upper Ocean
Pelagic	ERR1740325	Southern Ocean	-60.2287	-60.6476	Upper Ocean
Pelagic	ERR1740326	Atlantic Ocean	-20.9354	-35.1803	Upper Ocean
Pelagic	ERR1800786	Indian Ocean	28.62	34.68	Upper Ocean
Pelagic	ERR1801630	Indian Ocean	28.62	34.68	Upper Ocean
Pelagic	ERR1801631	Indian Ocean	28.62	34.68	Upper Ocean
Pelagic	ERR1801632	Indian Ocean	28.62	34.68	Upper Ocean
Pelagic	ERR1801633	Indian Ocean	28.62	34.68	Upper Ocean
Pelagic	ERR1801634	Indian Ocean	28.62	34.68	Upper Ocean
Pelagic	ERR1801635	Indian Ocean	28.62	34.68	Upper Ocean
Pelagic	ERR1801636	Indian Ocean	28.62	34.68	Upper Ocean
Pelagic	ERR1801658	Indian Ocean	28.62	34.68	Upper Ocean
Pelagic	ERR1801659	Indian Ocean	28.62	34.68	Upper Ocean
Pelagic	ERR1801660	Indian Ocean	28.62	34.68	Upper Ocean
Pelagic	ERR1801661	Indian Ocean	28.62	34.68	Upper Ocean
Pelagic	ERR1801662	Indian Ocean	28.62	34.68	Upper Ocean
Pelagic	ERR1801663	Indian Ocean	28.62	34.68	Upper Ocean
Pelagic	ERR1801664	Indian Ocean	28.62	34.68	Upper Ocean
Pelagic	ERR1801665	Indian Ocean	28.62	34.68	Upper Ocean
Pelagic	ERR1801666	Indian Ocean	28.62	34.68	Upper Ocean
Pelagic	ERR1801667	Indian Ocean	28.62	34.68	Upper Ocean
Pelagic	ERR1801668	Indian Ocean	28.62	34.68	Upper Ocean
Pelagic	ERR1801671	Indian Ocean	28.62	34.68	Upper Ocean
Pelagic	ERR1801672	Indian Ocean	28.62	34.68	Upper Ocean
Pelagic	ERR1801673	Indian Ocean	28.62	34.68	Upper Ocean
Pelagic	ERR1801674	Indian Ocean	28.62	34.68	Upper Ocean
Pelagic	ERR1855244	Arctic Ocean	85.723	-150.609	Upper Ocean
Pelagic	ERR1855248	Arctic Ocean	72.9989	-158.845	Upper Ocean
Pelagic	ERR1855249	Arctic Ocean	72.9989	-158.845	Upper Ocean
Pelagic	ERR1855250	Atlantic Ocean	56.75	27.1333	Upper Ocean
Pelagic	ERR1855253	Arctic Ocean	72.7999	-159.616	Upper Ocean
Pelagic	ERR1855254	Arctic Ocean	72.7999	-159.616	Upper Ocean
Pelagic	ERR1855255	Arctic Ocean	72.7978	-159.624	Upper Ocean
Pelagic	ERR1855257	Arctic Ocean	72.7978	-159.624	Upper Ocean
Pelagic	ERR1855258	Arctic Ocean	72.7978	-159.624	Upper Ocean
Pelagic	ERR1855259	Arctic Ocean	72.7978	-159.624	Upper Ocean
Pelagic	ERR1855260	Arctic Ocean	72.7978	-159.624	Upper Ocean
Pelagic	ERR1855261	Arctic Ocean	72.9989	-158.845	Mesopelagic Ocean
Pelagic	ERR1855262	Arctic Ocean	72.9989	-158.845	Upper Ocean
Pelagic	ERR1855264	Arctic Ocean	72.9989	-158.845	Upper Ocean
Pelagic	ERR1855265	Arctic Ocean	72.9989	-158.845	Upper Ocean
Pelagic	ERR1855267	Arctic Ocean	78.1739	-147.833	Upper Ocean
Pelagic	ERR1855272	Arctic Ocean	85.1603	-149.972	Upper Ocean
Pelagic	ERR1855283	Arctic Ocean	89.9903	-89.2525	Upper Ocean
Pelagic	ERR1855290	Arctic Ocean	89.9903	-89.2525	Upper Ocean
Pelagic	ERR1855291	Arctic Ocean	89.9903	-89.2525	Upper Ocean
Pelagic	ERR1995156	Atlantic Ocean	27.542	-97.286	Upper Ocean
Pelagic	ERR1995157	Atlantic Ocean	27.542	-97.286	Upper Ocean
Pelagic	ERR1995158	Atlantic Ocean	27.542	-97.286	Upper Ocean
Pelagic	ERR1995198	Atlantic Ocean	27.542	-97.286	Upper Ocean
Pelagic	ERR1995199	Atlantic Ocean	27.542	-97.286	Upper Ocean
Pelagic	ERR1995200	Atlantic Ocean	27.542	-97.286	Upper Ocean
Pelagic	ERR1995201	Atlantic Ocean	27.542	-97.286	Upper Ocean
Pelagic	ERR1995202	Atlantic Ocean	27.542	-97.286	Upper Ocean
Pelagic	ERR1995203	Atlantic Ocean	27.542	-97.286	Upper Ocean
Pelagic	ERR2002980	Atlantic Ocean	55.8355	3.5624	Upper Ocean
Pelagic	ERR2002981	Atlantic Ocean	52.1498	2.8427	Upper Ocean
Pelagic	ERR2002982	Atlantic Ocean	50.4967	1.1655	Upper Ocean
Pelagic	ERR2002983	Atlantic Ocean	51.5395	3.1823	Upper Ocean
Pelagic	ERR2021503	Pacific Ocean	45.9332	-129.982	Dark Ocean
Pelagic	ERR2021505	Pacific Ocean	45.9332	-130.014	Dark Ocean
Pelagic	ERR2021507	Pacific Ocean	45.9332	-129.982	Dark Ocean
Pelagic	ERR2021509	Pacific Ocean	46.0747	-129.995	Dark Ocean
Pelagic	ERR2021511	Pacific Ocean	45.9336	-130.014	Dark Ocean
Pelagic	ERR2021513	Pacific Ocean	46.2739	-129.795	Dark Ocean
Pelagic	ERR2092761	Pacific Ocean	34.8	127.8	Upper Ocean
Pelagic	ERR2092762	Pacific Ocean	34.8	127.8	Upper Ocean
Pelagic	ERR2092763	Pacific Ocean	34.8	127.8	Upper Ocean
Pelagic	ERR2092764	Pacific Ocean	34.8	127.8	Upper Ocean
Pelagic	ERR2092765	Pacific Ocean	34.8	127.8	Upper Ocean
Pelagic	ERR2092766	Pacific Ocean	34.8	127.8	Upper Ocean
Pelagic	ERR2092767	Pacific Ocean	34.8	127.8	Upper Ocean
Pelagic	ERR2092768	Pacific Ocean	34.8	127.8	Upper Ocean
Pelagic	ERR2092769	Pacific Ocean	34.8	127.8	Upper Ocean
Pelagic	ERR2092770	Pacific Ocean	34.8	127.8	Upper Ocean
Pelagic	ERR2092771	Pacific Ocean	34.8	127.8	Upper Ocean
Pelagic	ERR2092772	Pacific Ocean	34.8	127.8	Upper Ocean
Pelagic	ERR2092773	Pacific Ocean	34.8	127.8	Upper Ocean
Pelagic	ERR2092774	Pacific Ocean	34.8	127.8	Upper Ocean
Pelagic	ERR2092775	Pacific Ocean	34.8	127.8	Upper Ocean
Pelagic	ERR2094669	Pacific Ocean	33.454	-118.475	Upper Ocean
Pelagic	ERR2094670	Pacific Ocean	33.454	-118.475	Upper Ocean
Pelagic	ERR2094671	Pacific Ocean	33.454	-118.475	Upper Ocean
Pelagic	ERR2094672	Pacific Ocean	33.454	-118.475	Upper Ocean
Pelagic	ERR2094673	Pacific Ocean	33.71	-118.254	Upper Ocean
Pelagic	ERR2094674	Pacific Ocean	33.71	-118.254	Upper Ocean
Pelagic	ERR2094675	Pacific Ocean	33.71	-118.254	Upper Ocean
Pelagic	ERR2094676	Pacific Ocean	33.71	-118.254	Upper Ocean
Pelagic	ERR2094677	Pacific Ocean	33.55	-118.4	Upper Ocean
Pelagic	ERR2094678	Pacific Ocean	33.55	-118.4	Upper Ocean
Pelagic	ERR2094679	Pacific Ocean	33.55	-118.4	Upper Ocean
Pelagic	ERR2094680	Pacific Ocean	33.55	-118.4	Upper Ocean
Pelagic	ERR2098365	Mediterranean Sea	42.487	3.169	Upper Ocean
Pelagic	ERR2098366	Mediterranean Sea	42.487	3.169	Upper Ocean
Pelagic	ERR2098367	Mediterranean Sea	42.487	3.169	Upper Ocean
Pelagic	ERR2098368	Mediterranean Sea	42.487	3.169	Upper Ocean
Pelagic	ERR2098369	Mediterranean Sea	42.487	3.169	Upper Ocean
Pelagic	ERR2098370	Mediterranean Sea	42.487	3.169	Upper Ocean
Pelagic	ERR2098371	Mediterranean Sea	42.487	3.169	Upper Ocean
Pelagic	ERR2098372	Mediterranean Sea	42.487	3.169	Upper Ocean
Pelagic	ERR2098373	Mediterranean Sea	42.487	3.169	Upper Ocean
Pelagic	ERR2098374	Mediterranean Sea	42.487	3.169	Upper Ocean
Pelagic	ERR2098375	Mediterranean Sea	42.487	3.169	Upper Ocean
Pelagic	ERR2098376	Mediterranean Sea	42.487	3.169	Upper Ocean
Pelagic	ERR2098377	Mediterranean Sea	42.487	3.169	Upper Ocean
Pelagic	ERR2098378	Mediterranean Sea	42.487	3.169	Upper Ocean
Pelagic	ERR2098379	Mediterranean Sea	42.487	3.169	Upper Ocean
Pelagic	ERR2098380	Mediterranean Sea	42.487	3.169	Upper Ocean
Pelagic	ERR2098381	Mediterranean Sea	42.487	3.169	Upper Ocean
Pelagic	ERR2098382	Mediterranean Sea	42.487	3.169	Upper Ocean
Pelagic	ERR2098383	Mediterranean Sea	42.487	3.169	Upper Ocean
Pelagic	ERR2098384	Mediterranean Sea	42.487	3.169	Upper Ocean
Pelagic	ERR2098385	Mediterranean Sea	42.487	3.169	Upper Ocean
Pelagic	ERR2098386	Mediterranean Sea	42.487	3.169	Upper Ocean
Pelagic	ERR2098387	Mediterranean Sea	42.487	3.169	Upper Ocean
Pelagic	ERR2098388	Mediterranean Sea	42.487	3.169	Upper Ocean
Pelagic	ERR2098389	Mediterranean Sea	42.487	3.169	Upper Ocean
Pelagic	ERR2098390	Mediterranean Sea	42.487	3.169	Upper Ocean
Pelagic	ERR2098391	Mediterranean Sea	42.487	3.169	Upper Ocean
Pelagic	ERR2098392	Mediterranean Sea	42.487	3.169	Upper Ocean
Pelagic	ERR2098393	Mediterranean Sea	42.487	3.169	Upper Ocean
Pelagic	ERR2098394	Mediterranean Sea	42.487	3.169	Upper Ocean
Pelagic	ERR2098395	Mediterranean Sea	42.487	3.169	Upper Ocean
Pelagic	ERR2098396	Mediterranean Sea	42.487	3.169	Upper Ocean
Pelagic	ERR2098397	Mediterranean Sea	42.487	3.169	Upper Ocean
Pelagic	ERR2098398	Mediterranean Sea	42.487	3.169	Upper Ocean
Pelagic	ERR2098399	Mediterranean Sea	42.487	3.169	Upper Ocean
Pelagic	ERR2098400	Mediterranean Sea	42.487	3.169	Upper Ocean
Pelagic	ERR2098401	Mediterranean Sea	42.487	3.169	Upper Ocean
Pelagic	ERR2098402	Mediterranean Sea	42.487	3.169	Upper Ocean
Pelagic	ERR2098403	Mediterranean Sea	42.487	3.169	Upper Ocean
Pelagic	ERR2098404	Mediterranean Sea	42.487	3.169	Upper Ocean
Pelagic	ERR2098405	Mediterranean Sea	42.487	3.169	Upper Ocean
Pelagic	ERR2098406	Mediterranean Sea	42.487	3.17	Upper Ocean
Pelagic	ERR2098407	Mediterranean Sea	42.487	3.17	Upper Ocean
Pelagic	ERR2098408	Mediterranean Sea	42.487	3.17	Upper Ocean
Pelagic	ERR2098409	Mediterranean Sea	42.487	3.17	Upper Ocean
Pelagic	ERR2098410	Mediterranean Sea	42.487	3.17	Upper Ocean
Pelagic	ERR2098411	Mediterranean Sea	42.487	3.17	Upper Ocean
Pelagic	ERR2168915	Arctic Ocean	83.7143	-174.211	Dark Ocean
Pelagic	ERR2168916	Arctic Ocean	83.7143	-174.211	Dark Ocean
Pelagic	ERR2168917	Arctic Ocean	83.7143	-174.211	Dark Ocean
Pelagic	ERR2168918	Arctic Ocean	83.7143	-174.211	Dark Ocean
Pelagic	ERR2168919	Arctic Ocean	83.7143	-174.211	Dark Ocean
Pelagic	ERR2168920	Arctic Ocean	83.7143	-174.211	Dark Ocean
Pelagic	ERR2168921	Arctic Ocean	83.7143	-174.211	Dark Ocean
Pelagic	ERR2168922	Arctic Ocean	83.7143	-174.211	Dark Ocean
Pelagic	ERR2168923	Arctic Ocean	83.7143	-174.211	Dark Ocean
Pelagic	ERR2168924	Arctic Ocean	83.7143	-174.211	Dark Ocean
Pelagic	ERR2168925	Arctic Ocean	83.7143	-174.211	Dark Ocean
Pelagic	ERR2168926	Arctic Ocean	83.7143	-174.211	Dark Ocean
Pelagic	ERR2168927	Arctic Ocean	83.7143	-174.211	Dark Ocean
Pelagic	ERR2168928	Arctic Ocean	83.7143	-174.211	Dark Ocean
Pelagic	ERR2168931	Arctic Ocean	83.7549	-174.817	Upper Ocean
Pelagic	ERR2168932	Arctic Ocean	83.7549	-174.817	Upper Ocean
Pelagic	ERR2168933	Arctic Ocean	83.7549	-174.817	Upper Ocean
Pelagic	ERR2168934	Arctic Ocean	83.7549	-174.817	Upper Ocean
Pelagic	ERR2168935	Arctic Ocean	83.7549	-174.817	Upper Ocean
Pelagic	ERR2168936	Arctic Ocean	83.7549	-174.817	Upper Ocean
Pelagic	ERR2168937	Arctic Ocean	83.7549	-174.817	Mesopelagic Ocean
Pelagic	ERR2168938	Arctic Ocean	83.7549	-174.817	Mesopelagic Ocean
Pelagic	ERR2168939	Arctic Ocean	83.7549	-174.817	Mesopelagic Ocean
Pelagic	ERR2168940	Arctic Ocean	83.7549	-174.817	Mesopelagic Ocean
Pelagic	ERR2168941	Arctic Ocean	83.7549	-174.817	Mesopelagic Ocean
Pelagic	ERR2168942	Arctic Ocean	83.7549	-174.817	Mesopelagic Ocean
Pelagic	ERR2168943	Arctic Ocean	83.7143	-174.211	Mesopelagic Ocean
Pelagic	ERR2168944	Arctic Ocean	83.7143	-174.211	Mesopelagic Ocean
Pelagic	ERR2168945	Arctic Ocean	87.5301	-180	Upper Ocean
Pelagic	ERR2168946	Arctic Ocean	87.5301	-180	Upper Ocean
Pelagic	ERR2168947	Arctic Ocean	87.5856	-178.927	Mesopelagic Ocean
Pelagic	ERR2168948	Arctic Ocean	87.5856	-178.927	Mesopelagic Ocean
Pelagic	ERR2168950	Arctic Ocean	87.5856	-178.927	Mesopelagic Ocean
Pelagic	ERR2168951	Arctic Ocean	87.5856	-178.927	Mesopelagic Ocean
Pelagic	ERR2168952	Arctic Ocean	87.5856	-178.927	Mesopelagic Ocean
Pelagic	ERR2168953	Arctic Ocean	87.5856	-178.927	Mesopelagic Ocean
Pelagic	ERR2168954	Arctic Ocean	87.5856	-178.927	Mesopelagic Ocean
Pelagic	ERR2168955	Arctic Ocean	87.5856	-178.927	Dark Ocean
Pelagic	ERR2168956	Arctic Ocean	87.5856	-178.927	Dark Ocean
Pelagic	ERR2168957	Arctic Ocean	87.5856	-178.927	Dark Ocean
Pelagic	ERR2168958	Arctic Ocean	87.5856	-178.927	Dark Ocean
Pelagic	ERR2168959	Arctic Ocean	87.5856	-178.927	Dark Ocean
Pelagic	ERR2168960	Arctic Ocean	87.5856	-178.927	Dark Ocean
Pelagic	ERR2168961	Arctic Ocean	87.5856	-178.927	Dark Ocean
Pelagic	ERR2168962	Arctic Ocean	87.5856	-178.927	Dark Ocean
Pelagic	ERR2168963	Arctic Ocean	87.5856	-178.927	Dark Ocean
Pelagic	ERR2168964	Arctic Ocean	87.5856	-178.927	Dark Ocean
Pelagic	ERR2168965	Arctic Ocean	87.5301	-180	Upper Ocean
Pelagic	ERR2168966	Arctic Ocean	87.5301	-180	Upper Ocean
Pelagic	ERR2168967	Arctic Ocean	87.5301	-180	Upper Ocean
Pelagic	ERR2168968	Arctic Ocean	87.5301	-180	Upper Ocean
Pelagic	ERR2168969	Arctic Ocean	87.5301	-180	Upper Ocean
Pelagic	ERR2168970	Arctic Ocean	87.5301	-180	Upper Ocean
Pelagic	ERR2168971	Arctic Ocean	87.5301	-180	Upper Ocean
Pelagic	ERR2168972	Arctic Ocean	87.5301	-180	Upper Ocean
Pelagic	ERR2168973	Arctic Ocean	87.5301	-180	Upper Ocean
Pelagic	ERR2168974	Arctic Ocean	87.5301	-180	Upper Ocean
Pelagic	ERR2168975	Arctic Ocean	87.5301	-180	Upper Ocean
Pelagic	ERR2168976	Arctic Ocean	87.5301	-180	Upper Ocean
Pelagic	ERR2168977	Arctic Ocean	87.5301	-180	Mesopelagic Ocean
Pelagic	ERR2168978	Arctic Ocean	87.5301	-180	Mesopelagic Ocean
Pelagic	ERR2168979	Arctic Ocean	87.5856	-178.927	Mesopelagic Ocean
Pelagic	ERR2168980	Arctic Ocean	87.5856	-178.927	Mesopelagic Ocean
Pelagic	ERR2169017	Arctic Ocean	82.5038	-149.791	Upper Ocean
Pelagic	ERR2169018	Arctic Ocean	82.5038	-149.791	Upper Ocean
Pelagic	ERR2169019	Arctic Ocean	83.7143	-174.211	Mesopelagic Ocean
Pelagic	ERR2169035	Arctic Ocean	77.0066	-148.837	Upper Ocean
Pelagic	ERR2169036	Arctic Ocean	77.0066	-148.837	Upper Ocean
Pelagic	ERR2191545	Atlantic Ocean	57.434	16.66	Upper Ocean
Pelagic	ERR2191546	Atlantic Ocean	57.434	16.66	Upper Ocean
Pelagic	ERR2196983	Mediterranean Sea	42.487	3.169	Upper Ocean
Pelagic	ERR2196984	Mediterranean Sea	42.487	3.169	Upper Ocean
Pelagic	ERR2196985	Mediterranean Sea	42.487	3.169	Upper Ocean
Pelagic	ERR2206751	Atlantic Ocean	58.1323	10	Upper Ocean
Pelagic	ERR2206752	Atlantic Ocean	58.1323	10	Upper Ocean
Pelagic	ERR2206753	Atlantic Ocean	58.1323	10	Upper Ocean
Pelagic	ERR2206754	Atlantic Ocean	57.3057	20.0766	Upper Ocean
Pelagic	ERR2206755	Atlantic Ocean	57.3057	20.0766	Upper Ocean
Pelagic	ERR2206756	Atlantic Ocean	57.3057	20.0766	Upper Ocean
Pelagic	ERR2206757	Atlantic Ocean	65.446	23.2973	Upper Ocean
Pelagic	ERR2206758	Atlantic Ocean	65.446	23.2973	Upper Ocean
Pelagic	ERR2206759	Atlantic Ocean	65.446	23.2973	Upper Ocean
Pelagic	ERR2206760	Atlantic Ocean	56.867	11.4339	Upper Ocean
Pelagic	ERR2206761	Atlantic Ocean	56.867	11.4339	Upper Ocean
Pelagic	ERR2206762	Atlantic Ocean	56.867	11.4339	Upper Ocean
Pelagic	ERR2206763	Atlantic Ocean	54.2821	11.568	Upper Ocean
Pelagic	ERR2206764	Atlantic Ocean	54.2821	11.568	Upper Ocean
Pelagic	ERR2206765	Atlantic Ocean	54.2821	11.568	Upper Ocean
Pelagic	ERR2206766	Atlantic Ocean	54.6979	12.7047	Upper Ocean
Pelagic	ERR2206767	Atlantic Ocean	54.6979	12.7047	Upper Ocean
Pelagic	ERR2206768	Atlantic Ocean	54.6979	12.7047	Upper Ocean
Pelagic	ERR2206769	Atlantic Ocean	55.5659	16.3665	Upper Ocean
Pelagic	ERR2206770	Atlantic Ocean	55.5659	16.3665	Upper Ocean
Pelagic	ERR2206771	Atlantic Ocean	55.5659	16.3665	Upper Ocean
Pelagic	ERR2206772	Atlantic Ocean	58.5849	18.2327	Upper Ocean
Pelagic	ERR2206773	Atlantic Ocean	58.5849	18.2327	Upper Ocean
Pelagic	ERR2206774	Atlantic Ocean	58.5849	18.2327	Upper Ocean
Pelagic	ERR2206775	Atlantic Ocean	61.7829	19.2952	Upper Ocean
Pelagic	ERR2206776	Atlantic Ocean	61.7829	19.2952	Upper Ocean
Pelagic	ERR2206777	Atlantic Ocean	61.7829	19.2952	Upper Ocean
Pelagic	ERR2206778	Atlantic Ocean	57.1162	17.6642	Upper Ocean
Pelagic	ERR2206779	Atlantic Ocean	57.1162	17.6642	Upper Ocean
Pelagic	ERR2206780	Atlantic Ocean	57.1162	17.6642	Upper Ocean
Pelagic	ERR2206785	Atlantic Ocean	57.3222	20.0506	Upper Ocean
Pelagic	ERR2206786	Atlantic Ocean	57.3222	20.0506	Upper Ocean
Pelagic	ERR2206787	Atlantic Ocean	57.3222	20.0506	Upper Ocean
Pelagic	ERR2206788	Atlantic Ocean	57.3222	20.0506	Upper Ocean
Pelagic	ERR2206789	Atlantic Ocean	57.3222	20.0506	Upper Ocean
Pelagic	ERR2206790	Atlantic Ocean	57.3222	20.0506	Upper Ocean
Pelagic	ERR2206791	Atlantic Ocean	57.3222	20.0506	Upper Ocean
Pelagic	ERR2206792	Atlantic Ocean	57.3222	20.0506	Upper Ocean
Pelagic	ERR2206793	Atlantic Ocean	54.5381	10.0478	Upper Ocean
Pelagic	ERR2206794	Atlantic Ocean	54.5381	10.0478	Upper Ocean
Pelagic	ERR2206795	Atlantic Ocean	54.5381	10.0478	Upper Ocean
Pelagic	ERR2206796	Atlantic Ocean	54.5381	10.0478	Upper Ocean
Pelagic	ERR2206797	Atlantic Ocean	57.3228	20.0606	Upper Ocean
Pelagic	ERR2206798	Atlantic Ocean	57.3228	20.0606	Upper Ocean
Pelagic	ERR2281798	Pacific Ocean	22.38	113.78	Upper Ocean
Pelagic	ERR2281799	Pacific Ocean	22.38	113.78	Upper Ocean
Pelagic	ERR2281800	Pacific Ocean	22.38	113.78	Upper Ocean
Pelagic	ERR2281801	Pacific Ocean	22.38	113.78	Upper Ocean
Pelagic	ERR2281802	Pacific Ocean	22.38	113.78	Upper Ocean
Pelagic	ERR2281803	Pacific Ocean	22.38	113.78	Upper Ocean
Pelagic	ERR2281804	Pacific Ocean	22.38	113.78	Upper Ocean
Pelagic	ERR2281805	Pacific Ocean	22.38	113.78	Upper Ocean
Pelagic	ERR2281806	Pacific Ocean	22.38	113.78	Upper Ocean
Pelagic	ERR2281807	Pacific Ocean	22.38	113.78	Upper Ocean
Pelagic	ERR2281808	Pacific Ocean	22.38	113.78	Upper Ocean
Pelagic	ERR2281809	Pacific Ocean	22.38	113.78	Upper Ocean
Pelagic	ERR2497729	Atlantic Ocean	65.446	23.2973	Upper Ocean
Pelagic	ERR2497730	Atlantic Ocean	58.5849	18.2327	Upper Ocean
Pelagic	ERR2497731	Atlantic Ocean	58.1323	10	Upper Ocean
Pelagic	ERR2497732	Atlantic Ocean	65.446	23.2973	Upper Ocean
Pelagic	ERR2497733	Atlantic Ocean	58.5849	18.2327	Upper Ocean
Pelagic	ERR2497734	Atlantic Ocean	58.1323	10	Upper Ocean
Pelagic	ERR2497735	Atlantic Ocean	65.446	23.2973	Upper Ocean
Pelagic	ERR2497736	Atlantic Ocean	58.5849	18.2327	Upper Ocean
Pelagic	ERR2497737	Atlantic Ocean	58.1323	10	Upper Ocean
Pelagic	ERR2497738	Atlantic Ocean	65.446	23.2973	Upper Ocean
Pelagic	ERR2497739	Atlantic Ocean	58.5849	18.2327	Upper Ocean
Pelagic	ERR2497740	Atlantic Ocean	58.1323	10	Upper Ocean
Pelagic	ERR2497741	Atlantic Ocean	65.446	23.2973	Upper Ocean
Pelagic	ERR2497742	Atlantic Ocean	58.5849	18.2327	Upper Ocean
Pelagic	ERR2497743	Atlantic Ocean	58.1323	10	Upper Ocean
Pelagic	ERR2497744	Atlantic Ocean	65.446	23.2973	Upper Ocean
Pelagic	ERR2497745	Atlantic Ocean	58.5849	18.2327	Upper Ocean
Pelagic	ERR2497746	Atlantic Ocean	58.1323	10	Upper Ocean
Pelagic	ERR2598794	Pacific Ocean	33.454	-118.475	Upper Ocean
Pelagic	ERR2598795	Pacific Ocean	33.454	-118.475	Upper Ocean
Pelagic	ERR2598796	Pacific Ocean	33.454	-118.475	Upper Ocean
Pelagic	ERR2598797	Pacific Ocean	33.71	-118.254	Upper Ocean
Pelagic	ERR2598798	Pacific Ocean	33.71	-118.254	Upper Ocean
Pelagic	ERR2598799	Pacific Ocean	33.71	-118.254	Upper Ocean
Pelagic	ERR2598800	Pacific Ocean	33.71	-118.254	Upper Ocean
Pelagic	ERR2598801	Pacific Ocean	33.71	-118.254	Upper Ocean
Pelagic	ERR2598802	Pacific Ocean	33.55	-118.4	Upper Ocean
Pelagic	ERR2598803	Pacific Ocean	33.55	-118.4	Upper Ocean
Pelagic	ERR2598853	Pacific Ocean	33.454	-118.475	Upper Ocean
Pelagic	ERR2598854	Pacific Ocean	33.454	-118.475	Upper Ocean
Pelagic	ERR2598855	Pacific Ocean	33.71	-118.254	Upper Ocean
Pelagic	ERR2598856	Pacific Ocean	33.71	-118.254	Upper Ocean
Pelagic	ERR2598857	Pacific Ocean	33.55	-118.4	Upper Ocean
Pelagic	ERR2598858	Pacific Ocean	33.55	-118.4	Upper Ocean
Pelagic	ERR2604071	Mediterranean Sea	42.48	3.14	Upper Ocean
Pelagic	ERR2604072	Mediterranean Sea	42.48	3.14	Upper Ocean
Pelagic	ERR2604073	Mediterranean Sea	42.48	3.14	Upper Ocean
Pelagic	ERR2604074	Mediterranean Sea	42.48	3.14	Upper Ocean
Pelagic	ERR2604075	Mediterranean Sea	42.48	3.14	Upper Ocean
Pelagic	ERR2604076	Mediterranean Sea	42.48	3.14	Upper Ocean
Pelagic	ERR2604077	Mediterranean Sea	42.48	3.14	Upper Ocean
Pelagic	ERR2604078	Mediterranean Sea	42.48	3.14	Upper Ocean
Pelagic	ERR2604079	Mediterranean Sea	42.48	3.14	Upper Ocean
Pelagic	ERR2604080	Mediterranean Sea	42.48	3.14	Upper Ocean
Pelagic	ERR2604081	Mediterranean Sea	42.48	3.14	Upper Ocean
Pelagic	ERR2604082	Mediterranean Sea	42.48	3.14	Upper Ocean
Pelagic	ERR2604083	Mediterranean Sea	42.48	3.14	Upper Ocean
Pelagic	ERR2604084	Mediterranean Sea	42.48	3.14	Upper Ocean
Pelagic	ERR2604085	Mediterranean Sea	42.48	3.14	Upper Ocean
Pelagic	ERR2604086	Mediterranean Sea	42.48	3.14	Upper Ocean
Pelagic	ERR2604087	Mediterranean Sea	42.48	3.14	Upper Ocean
Pelagic	ERR2604088	Mediterranean Sea	42.48	3.14	Upper Ocean
Pelagic	ERR2604089	Mediterranean Sea	42.48	3.14	Upper Ocean
Pelagic	ERR2604090	Mediterranean Sea	42.48	3.14	Upper Ocean
Pelagic	ERR2604091	Mediterranean Sea	42.48	3.14	Upper Ocean
Pelagic	ERR2604092	Mediterranean Sea	42.48	3.14	Upper Ocean
Pelagic	ERR2604093	Mediterranean Sea	42.48	3.14	Upper Ocean
Pelagic	ERR2604094	Mediterranean Sea	42.48	3.14	Upper Ocean
Pelagic	ERR2604095	Mediterranean Sea	42.48	3.14	Upper Ocean
Pelagic	ERR2604096	Mediterranean Sea	42.48	3.14	Upper Ocean
Pelagic	ERR2604097	Mediterranean Sea	42.48	3.14	Upper Ocean
Pelagic	ERR2604098	Mediterranean Sea	42.48	3.14	Upper Ocean
Pelagic	ERR2604099	Mediterranean Sea	42.48	3.14	Upper Ocean
Pelagic	ERR2604100	Mediterranean Sea	42.48	3.14	Upper Ocean
Pelagic	ERR2604101	Mediterranean Sea	42.48	3.14	Upper Ocean
Pelagic	ERR2604102	Mediterranean Sea	42.48	3.14	Upper Ocean
Pelagic	ERR2604103	Mediterranean Sea	42.48	3.14	Upper Ocean
Pelagic	ERR2604104	Mediterranean Sea	42.48	3.14	Upper Ocean
Pelagic	ERR2604105	Mediterranean Sea	42.48	3.14	Upper Ocean
Pelagic	ERR2604106	Mediterranean Sea	42.8667	3.3	Upper Ocean
Pelagic	ERR2604107	Mediterranean Sea	42.48	3.14	Upper Ocean
Pelagic	ERR2604108	Mediterranean Sea	42.48	3.14	Upper Ocean
Pelagic	ERR2604109	Mediterranean Sea	42.48	3.14	Upper Ocean
Pelagic	ERR2604110	Mediterranean Sea	42.48	3.14	Upper Ocean
Pelagic	ERR315815	Mediterranean Sea	37.051	1.9378	Upper Ocean
Pelagic	ERR315817	Mediterranean Sea	37.051	1.9378	Upper Ocean
Pelagic	ERR315820	Mediterranean Sea	37.051	1.9378	Upper Ocean
Pelagic	ERR315821	Mediterranean Sea	37.051	1.9378	Upper Ocean
Pelagic	ERR315822	Mediterranean Sea	37.051	1.9378	Upper Ocean
Pelagic	ERR315862	Mediterranean Sea	33.9179	32.898	Upper Ocean
Pelagic	ERR420344	Pacific Ocean	45.9337	-130.013	Dark Ocean
Pelagic	ERR420345	Pacific Ocean	45.9337	-130.013	Dark Ocean
Pelagic	ERR420346	Pacific Ocean	45.9337	-130.013	Dark Ocean
Pelagic	ERR420347	Pacific Ocean	45.9337	-130.013	Dark Ocean
Pelagic	ERR420353	Pacific Ocean	45.9437	-129.985	Dark Ocean
Pelagic	ERR420354	Pacific Ocean	45.9437	-129.985	Dark Ocean
Pelagic	ERR420357	Pacific Ocean	45.9333	-130.014	Dark Ocean
Pelagic	ERR420358	Pacific Ocean	45.9333	-130.014	Dark Ocean
Pelagic	ERR420363	Pacific Ocean	45.9227	-129.988	Dark Ocean
Pelagic	ERR420364	Pacific Ocean	45.9227	-129.988	Dark Ocean
Pelagic	ERR420366	Pacific Ocean	45.9227	-129.988	Dark Ocean
Pelagic	ERR420367	Pacific Ocean	45.9227	-129.988	Dark Ocean
Pelagic	ERR420368	Pacific Ocean	45.9227	-129.988	Dark Ocean
Pelagic	ERR538171	Mediterranean Sea	42.1735	17.7175	Upper Ocean
Pelagic	ERR538173	Mediterranean Sea	42.2038	17.715	Upper Ocean
Pelagic	ERR538178	Mediterranean Sea	33.9179	32.898	Upper Ocean
Pelagic	ERR538179	Mediterranean Sea	33.9235	32.8118	Upper Ocean
Pelagic	ERR538181	Mediterranean Sea	37.0541	1.9478	Upper Ocean
Pelagic	ERR538182	Mediterranean Sea	37.0541	1.9478	Upper Ocean
Pelagic	ERR538184	Mediterranean Sea	42.2038	17.715	Upper Ocean
Pelagic	ERR538185	Mediterranean Sea	42.1916	17.7175	Upper Ocean
Pelagic	ERR538186	Mediterranean Sea	33.9179	32.898	Upper Ocean
Pelagic	ERR538188	Mediterranean Sea	33.9235	32.8118	Upper Ocean
Pelagic	ERR538189	Mediterranean Sea	33.9178	32.8849	Upper Ocean
Pelagic	ERR558441	Mediterranean Sea	32.3526	34.0642	Upper Ocean
Pelagic	ERR558489	Mediterranean Sea	32.5318	33.8814	Upper Ocean
Pelagic	ERR559527	Mediterranean Sea	32.7184	33.684	Upper Ocean
Pelagic	ERR559528	Mediterranean Sea	32.9057	33.9007	Upper Ocean
Pelagic	ERR559529	Mediterranean Sea	32.9051	34.4807	Upper Ocean
Pelagic	ERR588857	Pacific Ocean	-9.1504	-140.522	Upper Ocean
Pelagic	ERR594284	Pacific Ocean	-9.0063	-139.139	Upper Ocean
Pelagic	ERR594285	Pacific Ocean	-9.0714	-140.597	Upper Ocean
Pelagic	ERR594286	Atlantic Ocean	-20.9354	-35.1803	Upper Ocean
Pelagic	ERR594287	Pacific Ocean	-9.1504	-140.522	Upper Ocean
Pelagic	ERR594288	Mediterranean Sea	39.1633	5.916	Upper Ocean
Pelagic	ERR594289	Atlantic Ocean	-30.1471	-43.2915	Mesopelagic Ocean
Pelagic	ERR594290	Indian Ocean	20.8457	63.5851	Mesopelagic Ocean
Pelagic	ERR594291	Indian Ocean	-35.2421	26.3048	Upper Ocean
Pelagic	ERR594292	Pacific Ocean	-8.9971	-139.196	Upper Ocean
Pelagic	ERR594293	Pacific Ocean	-8.9109	-140.285	Upper Ocean
Pelagic	ERR594294	Atlantic Ocean	-31.027	4.6802	Upper Ocean
Pelagic	ERR594295	Indian Ocean	14.6059	69.9776	Upper Ocean
Pelagic	ERR594296	Pacific Ocean	-9.1504	-140.522	Upper Ocean
Pelagic	ERR594297	Atlantic Ocean	-31.0266	4.665	Upper Ocean
Pelagic	ERR594298	Atlantic Ocean	-21.0292	-35.3498	Upper Ocean
Pelagic	ERR594299	Atlantic Ocean	-20.4075	-3.1641	Mesopelagic Ocean
Pelagic	ERR594300	Pacific Ocean	-8.8999	-142.546	Upper Ocean
Pelagic	ERR594301	Pacific Ocean	-9.0063	-139.139	Upper Ocean
Pelagic	ERR594302	Atlantic Ocean	-31.0198	4.6685	Mesopelagic Ocean
Pelagic	ERR594303	Atlantic Ocean	-30.1484	-43.2705	Upper Ocean
Pelagic	ERR594304	Pacific Ocean	-9.0063	-139.139	Upper Ocean
Pelagic	ERR594305	Pacific Ocean	-8.9729	-139.239	Mesopelagic Ocean
Pelagic	ERR594306	Pacific Ocean	-8.9971	-139.196	Upper Ocean
Pelagic	ERR594307	Pacific Ocean	-8.9971	-139.196	Upper Ocean
Pelagic	ERR594308	Atlantic Ocean	-20.4075	-3.1641	Mesopelagic Ocean
Pelagic	ERR594309	Pacific Ocean	-8.9729	-139.239	Mesopelagic Ocean
Pelagic	ERR594310	Atlantic Ocean	-20.9354	-35.1803	Upper Ocean
Pelagic	ERR594311	Pacific Ocean	-9.1504	-140.522	Upper Ocean
Pelagic	ERR594312	Indian Ocean	19.0351	64.5638	Mesopelagic Ocean
Pelagic	ERR594313	Atlantic Ocean	-32.2401	17.7103	Upper Ocean
Pelagic	ERR594314	Indian Ocean	-9.3921	66.4228	Upper Ocean
Pelagic	ERR594315	Mediterranean Sea	39.0609	5.9422	Upper Ocean
Pelagic	ERR594316	Mediterranean Sea	39.1633	5.916	Upper Ocean
Pelagic	ERR594317	Mediterranean Sea	39.1633	5.916	Upper Ocean
Pelagic	ERR594318	Atlantic Ocean	-31.0266	4.665	Upper Ocean
Pelagic	ERR594319	Pacific Ocean	-8.9109	-140.285	Upper Ocean
Pelagic	ERR594320	Indian Ocean	-35.1728	26.2868	Upper Ocean
Pelagic	ERR594321	Atlantic Ocean	-21.0292	-35.3498	Upper Ocean
Pelagic	ERR594322	Pacific Ocean	-8.9729	-139.239	Mesopelagic Ocean
Pelagic	ERR594323	Pacific Ocean	-8.9111	-142.557	Upper Ocean
Pelagic	ERR594324	Indian Ocean	-29.5333	37.9117	Upper Ocean
Pelagic	ERR594325	Atlantic Ocean	-32.2401	17.7103	Upper Ocean
Pelagic	ERR594326	Pacific Ocean	-8.9068	-140.283	Upper Ocean
Pelagic	ERR594327	Indian Ocean	18.5918	66.622	Upper Ocean
Pelagic	ERR594328	Indian Ocean	18.3967	39.875	Upper Ocean
Pelagic	ERR594329	Mediterranean Sea	39.0609	5.9422	Upper Ocean
Pelagic	ERR594330	Indian Ocean	19.0393	64.4913	Upper Ocean
Pelagic	ERR594331	Atlantic Ocean	-20.4075	-3.1641	Mesopelagic Ocean
Pelagic	ERR594332	Atlantic Ocean	-30.1367	-43.2899	Upper Ocean
Pelagic	ERR594333	Atlantic Ocean	-20.9315	-35.1794	Mesopelagic Ocean
Pelagic	ERR594334	Indian Ocean	20.8183	63.5047	Upper Ocean
Pelagic	ERR594335	Atlantic Ocean	-20.4091	-3.1759	Upper Ocean
Pelagic	ERR594336	Atlantic Ocean	-30.1484	-43.2705	Upper Ocean
Pelagic	ERR594337	Pacific Ocean	-8.9109	-140.285	Upper Ocean
Pelagic	ERR594338	Pacific Ocean	-9.0714	-140.597	Upper Ocean
Pelagic	ERR594339	Pacific Ocean	-8.9111	-142.557	Upper Ocean
Pelagic	ERR594340	Atlantic Ocean	-30.1367	-43.2899	Upper Ocean
Pelagic	ERR594341	Pacific Ocean	-8.8999	-142.546	Upper Ocean
Pelagic	ERR594342	Pacific Ocean	-8.8999	-142.546	Upper Ocean
Pelagic	ERR594343	Pacific Ocean	-9.0714	-140.597	Upper Ocean
Pelagic	ERR594344	Pacific Ocean	-8.9111	-142.557	Upper Ocean
Pelagic	ERR594345	Indian Ocean	20.8457	63.5851	Mesopelagic Ocean
Pelagic	ERR594346	Indian Ocean	18.7341	66.3896	Mesopelagic Ocean
Pelagic	ERR594347	Pacific Ocean	-8.9068	-140.283	Upper Ocean
Pelagic	ERR594348	Atlantic Ocean	-31.027	4.6802	Upper Ocean
Pelagic	ERR594349	Atlantic Ocean	-20.4091	-3.1759	Upper Ocean
Pelagic	ERR594352	Mediterranean Sea	35.7528	14.2765	Upper Ocean
Pelagic	ERR594353	Atlantic Ocean	-20.4091	-3.1759	Upper Ocean
Pelagic	ERR594354	Atlantic Ocean	-20.9354	-35.1803	Upper Ocean
Pelagic	ERR594355	Atlantic Ocean	-21.0292	-35.3498	Upper Ocean
Pelagic	ERR594356	Indian Ocean	18.5918	66.622	Upper Ocean
Pelagic	ERR594357	Pacific Ocean	2.0299	-84.5546	Upper Ocean
Pelagic	ERR594358	Mediterranean Sea	35.759	14.2574	Upper Ocean
Pelagic	ERR594359	Indian Ocean	-35.1728	26.2868	Upper Ocean
Pelagic	ERR594360	Indian Ocean	23.4183	37.245	Upper Ocean
Pelagic	ERR594361	Indian Ocean	-35.1728	26.2868	Upper Ocean
Pelagic	ERR594362	Atlantic Ocean	-34.9449	17.9189	Upper Ocean
Pelagic	ERR594363	Indian Ocean	18.5679	66.4581	Upper Ocean
Pelagic	ERR594364	Atlantic Ocean	-8.7789	-17.9099	Upper Ocean
Pelagic	ERR594365	Indian Ocean	18.5918	66.622	Upper Ocean
Pelagic	ERR594366	Indian Ocean	14.5536	70.0128	Upper Ocean
Pelagic	ERR594367	Indian Ocean	14.5536	70.0128	Upper Ocean
Pelagic	ERR594368	Indian Ocean	18.3967	39.875	Upper Ocean
Pelagic	ERR594369	Indian Ocean	20.8183	63.5047	Upper Ocean
Pelagic	ERR594370	Indian Ocean	18.3967	39.875	Upper Ocean
Pelagic	ERR594371	Indian Ocean	14.5536	70.0128	Upper Ocean
Pelagic	ERR594372	Indian Ocean	14.5536	70.0128	Upper Ocean
Pelagic	ERR594373	Mediterranean Sea	47.426	8.517	Upper Ocean
Pelagic	ERR594374	Indian Ocean	19.0393	64.4913	Upper Ocean
Pelagic	ERR594375	Mediterranean Sea	39.3991	19.3997	Upper Ocean
Pelagic	ERR594376	Indian Ocean	-0.6625	73.161	Upper Ocean
Pelagic	ERR594377	Southern Ocean	-62.2231	-49.2139	Upper Ocean
Pelagic	ERR594378	Mediterranean Sea	39.8386	17.4155	Upper Ocean
Pelagic	ERR594379	Atlantic Ocean	-8.7296	-17.9604	Upper Ocean
Pelagic	ERR594380	Pacific Ocean	2.0663	-84.5304	Upper Ocean
Pelagic	ERR594381	Pacific Ocean	2.0663	-84.5304	Upper Ocean
Pelagic	ERR594382	Indian Ocean	-35.2421	26.3048	Upper Ocean
Pelagic	ERR594383	Pacific Ocean	2.0299	-84.5546	Upper Ocean
Pelagic	ERR594384	Indian Ocean	14.6059	69.9776	Upper Ocean
Pelagic	ERR594385	Indian Ocean	-29.5333	37.9117	Upper Ocean
Pelagic	ERR594386	Indian Ocean	19.0284	64.5126	Upper Ocean
Pelagic	ERR594387	Pacific Ocean	2.0663	-84.5304	Upper Ocean
Pelagic	ERR594388	Atlantic Ocean	-8.7986	-17.9034	Mesopelagic Ocean
Pelagic	ERR594389	Atlantic Ocean	-34.8901	18.0459	Upper Ocean
Pelagic	ERR594390	Indian Ocean	18.4417	39.8567	Upper Ocean
Pelagic	ERR594391	Atlantic Ocean	-31.0266	4.665	Upper Ocean
Pelagic	ERR594392	Indian Ocean	-29.5019	37.9889	Upper Ocean
Pelagic	ERR594393	Indian Ocean	23.36	37.2183	Upper Ocean
Pelagic	ERR594394	Indian Ocean	-16.9534	53.9601	Upper Ocean
Pelagic	ERR594395	Atlantic Ocean	-32.2401	17.7103	Upper Ocean
Pelagic	ERR594396	Mediterranean Sea	39.3888	19.3905	Upper Ocean
Pelagic	ERR594397	Indian Ocean	18.5679	66.4581	Upper Ocean
Pelagic	ERR594398	Indian Ocean	6.0001	73.8955	Upper Ocean
Pelagic	ERR594399	Indian Ocean	19.0284	64.5126	Upper Ocean
Pelagic	ERR594400	Indian Ocean	19.0393	64.4913	Upper Ocean
Pelagic	ERR594401	Indian Ocean	27.16	27.1433	Upper Ocean
Pelagic	ERR594402	Indian Ocean	20.8222	63.5133	Upper Ocean
Pelagic	ERR594403	Indian Ocean	6.0001	73.8955	Upper Ocean
Pelagic	ERR594404	Atlantic Ocean	-32.2401	17.7103	Upper Ocean
Pelagic	ERR594405	Mediterranean Sea	33.9235	32.8118	Upper Ocean
Pelagic	ERR594406	Mediterranean Sea	39.8386	17.4155	Upper Ocean
Pelagic	ERR594407	Atlantic Ocean	-20.4075	-3.1641	Mesopelagic Ocean
Pelagic	ERR594408	Mediterranean Sea	42.1735	17.7252	Upper Ocean
Pelagic	ERR594409	Atlantic Ocean	-47.2007	-57.9446	Upper Ocean
Pelagic	ERR594410	Indian Ocean	27.16	27.1433	Upper Ocean
Pelagic	ERR594411	Atlantic Ocean	-30.1367	-43.2899	Upper Ocean
Pelagic	ERR594412	Pacific Ocean	1.9928	-84.5766	Upper Ocean
Pelagic	ERR594413	Indian Ocean	5.9998	73.9067	Upper Ocean
Pelagic	ERR594414	Indian Ocean	-35.2421	26.3048	Upper Ocean
Pelagic	ERR594415	Atlantic Ocean	-31.027	4.6802	Upper Ocean
Pelagic	ERR598942	Pacific Ocean	35.4002	-127.75	Upper Ocean
Pelagic	ERR598943	Pacific Ocean	-5.2529	-85.1545	Upper Ocean
Pelagic	ERR598944	Atlantic Ocean	43.7182	-16.8714	Mesopelagic Ocean
Pelagic	ERR598945	Southern Ocean	-60.2287	-60.6476	Upper Ocean
Pelagic	ERR598946	Pacific Ocean	-12.9794	-96.0232	Upper Ocean
Pelagic	ERR598947	Atlantic Ocean	-31.0198	4.6685	Mesopelagic Ocean
Pelagic	ERR598948	Pacific Ocean	-9.0063	-139.139	Upper Ocean
Pelagic	ERR598949	Indian Ocean	19.0284	64.5126	Upper Ocean
Pelagic	ERR598950	Atlantic Ocean	36.5533	-6.5669	Upper Ocean
Pelagic	ERR598951	Mediterranean Sea	39.3888	19.3905	Upper Ocean
Pelagic	ERR598952	Pacific Ocean	2.0299	-84.5546	Upper Ocean
Pelagic	ERR598953	Pacific Ocean	-12.9794	-96.0232	Upper Ocean
Pelagic	ERR598954	Pacific Ocean	-23.2811	-129.395	Upper Ocean
Pelagic	ERR598955	Atlantic Ocean	36.5533	-6.5669	Upper Ocean
Pelagic	ERR598956	Pacific Ocean	-8.9109	-140.285	Upper Ocean
Pelagic	ERR598957	Pacific Ocean	-23.2189	-129.5	Upper Ocean
Pelagic	ERR598958	Atlantic Ocean	34.1504	-56.9684	Mesopelagic Ocean
Pelagic	ERR598959	Indian Ocean	18.3967	39.875	Upper Ocean
Pelagic	ERR598960	Indian Ocean	-35.1889	26.2905	Mesopelagic Ocean
Pelagic	ERR598961	Pacific Ocean	-16.9587	-100.675	Upper Ocean
Pelagic	ERR598962	Pacific Ocean	-5.2669	-85.2732	Upper Ocean
Pelagic	ERR598963	Atlantic Ocean	34.1132	-49.9181	Upper Ocean
Pelagic	ERR598964	Atlantic Ocean	34.0771	-49.8233	Mesopelagic Ocean
Pelagic	ERR598965	Pacific Ocean	-33.9116	-73.0537	Upper Ocean
Pelagic	ERR598966	Indian Ocean	20.8183	63.5047	Upper Ocean
Pelagic	ERR598967	Pacific Ocean	-29.7238	-101.16	Upper Ocean
Pelagic	ERR598968	Atlantic Ocean	34.6712	-71.3093	Upper Ocean
Pelagic	ERR598969	Indian Ocean	27.16	27.1433	Upper Ocean
Pelagic	ERR598970	Indian Ocean	-29.5019	37.9889	Upper Ocean
Pelagic	ERR598971	Pacific Ocean	2.0649	-84.5546	Mesopelagic Ocean
Pelagic	ERR598972	Indian Ocean	-29.5333	37.9117	Upper Ocean
Pelagic	ERR598973	Atlantic Ocean	-34.9449	17.9189	Upper Ocean
Pelagic	ERR598974	Indian Ocean	20.8222	63.5133	Upper Ocean
Pelagic	ERR598975	Indian Ocean	18.4417	39.8567	Upper Ocean
Pelagic	ERR598976	Atlantic Ocean	36.1715	-29.023	Upper Ocean
Pelagic	ERR598977	Indian Ocean	14.5536	70.0128	Upper Ocean
Pelagic	ERR598978	Pacific Ocean	-5.2529	-85.1545	Upper Ocean
Pelagic	ERR598979	Indian Ocean	-35.1728	26.2868	Upper Ocean
Pelagic	ERR598980	Pacific Ocean	31.528	-159.022	Mesopelagic Ocean
Pelagic	ERR598981	Pacific Ocean	-12.9794	-96.0232	Upper Ocean
Pelagic	ERR598982	Atlantic Ocean	-34.8901	18.0459	Upper Ocean
Pelagic	ERR598983	Atlantic Ocean	39.2305	-70.0377	Upper Ocean
Pelagic	ERR598984	Atlantic Ocean	-8.7789	-17.9099	Upper Ocean
Pelagic	ERR598985	Atlantic Ocean	25.6236	-88.45	Mesopelagic Ocean
Pelagic	ERR598986	Atlantic Ocean	36.1811	-28.9373	Upper Ocean
Pelagic	ERR598987	Pacific Ocean	14.2075	-116.647	Upper Ocean
Pelagic	ERR598988	Pacific Ocean	-9.0714	-140.597	Upper Ocean
Pelagic	ERR598989	Pacific Ocean	14.2035	-116.626	Upper Ocean
Pelagic	ERR598990	Indian Ocean	-35.2421	26.3048	Upper Ocean
Pelagic	ERR598991	Indian Ocean	18.3967	39.875	Upper Ocean
Pelagic	ERR598992	Pacific Ocean	-8.9971	-139.196	Upper Ocean
Pelagic	ERR598993	Mediterranean Sea	35.759	14.2574	Upper Ocean
Pelagic	ERR598994	Atlantic Ocean	-32.2401	17.7103	Upper Ocean
Pelagic	ERR598995	Pacific Ocean	31.5168	-159.046	Upper Ocean
Pelagic	ERR598996	Atlantic Ocean	35.8427	-37.1526	Upper Ocean
Pelagic	ERR598997	Pacific Ocean	1.9928	-84.5766	Upper Ocean
Pelagic	ERR598998	Pacific Ocean	-8.9109	-140.285	Upper Ocean
Pelagic	ERR598999	Pacific Ocean	-8.9729	-139.239	Mesopelagic Ocean
Pelagic	ERR599000	Atlantic Ocean	-20.9315	-35.1794	Mesopelagic Ocean
Pelagic	ERR599001	Atlantic Ocean	43.7684	-16.9047	Upper Ocean
Pelagic	ERR599002	Indian Ocean	-16.9534	53.9601	Upper Ocean
Pelagic	ERR599003	Atlantic Ocean	36.5533	-6.5669	Upper Ocean
Pelagic	ERR599004	Pacific Ocean	6.3559	-103.06	Mesopelagic Ocean
Pelagic	ERR599005	Atlantic Ocean	-8.7986	-17.9034	Mesopelagic Ocean
Pelagic	ERR599006	Atlantic Ocean	-30.1367	-43.2899	Upper Ocean
Pelagic	ERR599007	Pacific Ocean	-5.2669	-85.2732	Upper Ocean
Pelagic	ERR599008	Southern Ocean	-61.9689	-49.5017	Mesopelagic Ocean
Pelagic	ERR599009	Atlantic Ocean	-47.1863	-58.2902	Upper Ocean
Pelagic	ERR599010	Atlantic Ocean	-20.9354	-35.1803	Upper Ocean
Pelagic	ERR599011	Indian Ocean	14.6059	69.9776	Upper Ocean
Pelagic	ERR599012	Indian Ocean	-22.3368	40.3412	Upper Ocean
Pelagic	ERR599013	Indian Ocean	5.9998	73.9067	Upper Ocean
Pelagic	ERR599014	Pacific Ocean	-1.9002	-84.6265	Upper Ocean
Pelagic	ERR599015	Pacific Ocean	14.2025	-116.643	Mesopelagic Ocean
Pelagic	ERR599016	Indian Ocean	-16.9534	53.9601	Upper Ocean
Pelagic	ERR599017	Atlantic Ocean	-31.027	4.6802	Upper Ocean
Pelagic	ERR599018	Indian Ocean	-35.2421	26.3048	Upper Ocean
Pelagic	ERR599019	Indian Ocean	-9.3921	66.4228	Upper Ocean
Pelagic	ERR599020	Pacific Ocean	-1.8902	-84.6141	Mesopelagic Ocean
Pelagic	ERR599021	Indian Ocean	-29.5046	37.9599	Mesopelagic Ocean
Pelagic	ERR599022	Atlantic Ocean	-30.1367	-43.2899	Upper Ocean
Pelagic	ERR599023	Indian Ocean	-29.5333	37.9117	Upper Ocean
Pelagic	ERR599024	Pacific Ocean	-21.146	-104.787	Upper Ocean
Pelagic	ERR599025	Indian Ocean	-29.5333	37.9117	Upper Ocean
Pelagic	ERR599026	Indian Ocean	-17.2855	42.2866	Upper Ocean
Pelagic	ERR599027	Atlantic Ocean	-47.2007	-57.9446	Upper Ocean
Pelagic	ERR599028	Indian Ocean	20.8222	63.5133	Upper Ocean
Pelagic	ERR599029	Atlantic Ocean	9.8481	-80.0454	Upper Ocean
Pelagic	ERR599030	Pacific Ocean	6.3332	-102.943	Upper Ocean
Pelagic	ERR599031	Indian Ocean	20.8457	63.5851	Mesopelagic Ocean
Pelagic	ERR599032	Pacific Ocean	0.0222	-153.686	Upper Ocean
Pelagic	ERR599033	Pacific Ocean	-8.9729	-139.239	Mesopelagic Ocean
Pelagic	ERR599034	Indian Ocean	-35.1889	26.2905	Mesopelagic Ocean
Pelagic	ERR599035	Atlantic Ocean	-47.1863	-58.2902	Upper Ocean
Pelagic	ERR599036	Pacific Ocean	-9.1504	-140.522	Upper Ocean
Pelagic	ERR599037	Indian Ocean	18.7341	66.3896	Mesopelagic Ocean
Pelagic	ERR599038	Pacific Ocean	0.0003	-153.676	Upper Ocean
Pelagic	ERR599039	Pacific Ocean	-2.0133	-84.589	Upper Ocean
Pelagic	ERR599040	Atlantic Ocean	-21.0292	-35.3498	Upper Ocean
Pelagic	ERR599041	Indian Ocean	23.36	37.2183	Upper Ocean
Pelagic	ERR599042	Pacific Ocean	-25.826	-111.729	Upper Ocean
Pelagic	ERR599043	Mediterranean Sea	39.3888	19.3905	Upper Ocean
Pelagic	ERR599044	Atlantic Ocean	-20.4075	-3.1641	Mesopelagic Ocean
Pelagic	ERR599045	Indian Ocean	0.0033	71.6428	Upper Ocean
Pelagic	ERR599046	Atlantic Ocean	-30.1484	-43.2705	Upper Ocean
Pelagic	ERR599047	Atlantic Ocean	34.6663	-71.2907	Mesopelagic Ocean
Pelagic	ERR599048	Atlantic Ocean	-8.7986	-17.9034	Mesopelagic Ocean
Pelagic	ERR599049	Indian Ocean	21.9467	38.2517	Upper Ocean
Pelagic	ERR599050	Pacific Ocean	-32.7971	-87.0693	Upper Ocean
Pelagic	ERR599051	Pacific Ocean	6.3559	-103.06	Mesopelagic Ocean
Pelagic	ERR599052	Pacific Ocean	35.3671	-127.742	Upper Ocean
Pelagic	ERR599053	Indian Ocean	14.5536	70.0128	Upper Ocean
Pelagic	ERR599054	Indian Ocean	0.0033	71.6428	Upper Ocean
Pelagic	ERR599055	Pacific Ocean	-5.261	-85.1678	Mesopelagic Ocean
Pelagic	ERR599056	Atlantic Ocean	-31.027	4.6802	Upper Ocean
Pelagic	ERR599057	Indian Ocean	-15.3424	43.2965	Upper Ocean
Pelagic	ERR599058	Indian Ocean	-17.0248	42.7401	Upper Ocean
Pelagic	ERR599059	Southern Ocean	-60.2287	-60.6476	Upper Ocean
Pelagic	ERR599060	Pacific Ocean	6.3559	-103.06	Mesopelagic Ocean
Pelagic	ERR599061	Indian Ocean	23.4183	37.245	Upper Ocean
Pelagic	ERR599062	Indian Ocean	20.8457	63.5851	Mesopelagic Ocean
Pelagic	ERR599063	Pacific Ocean	-13.0023	-95.9759	Upper Ocean
Pelagic	ERR599064	Pacific Ocean	-34.0614	-73.1066	Upper Ocean
Pelagic	ERR599065	Pacific Ocean	2.0299	-84.5546	Upper Ocean
Pelagic	ERR599066	Pacific Ocean	-8.9111	-142.557	Upper Ocean
Pelagic	ERR599067	Pacific Ocean	2.0649	-84.5546	Mesopelagic Ocean
Pelagic	ERR599068	Atlantic Ocean	-34.9449	17.9189	Upper Ocean
Pelagic	ERR599069	Pacific Ocean	-9.1504	-140.522	Upper Ocean
Pelagic	ERR599070	Pacific Ocean	14.2075	-116.647	Upper Ocean
Pelagic	ERR599071	Pacific Ocean	-25.8076	-111.691	Mesopelagic Ocean
Pelagic	ERR599072	Pacific Ocean	-23.2232	-129.599	Mesopelagic Ocean
Pelagic	ERR599073	Mediterranean Sea	35.7528	14.2765	Upper Ocean
Pelagic	ERR599074	Indian Ocean	14.6059	69.9776	Upper Ocean
Pelagic	ERR599075	Indian Ocean	6.0001	73.8955	Upper Ocean
Pelagic	ERR599076	Pacific Ocean	14.2025	-116.643	Mesopelagic Ocean
Pelagic	ERR599077	Pacific Ocean	-16.9601	-100.633	Upper Ocean
Pelagic	ERR599078	Atlantic Ocean	43.6792	-16.8344	Upper Ocean
Pelagic	ERR599079	Pacific Ocean	-25.826	-111.729	Upper Ocean
Pelagic	ERR599080	Pacific Ocean	-9.1504	-140.522	Upper Ocean
Pelagic	ERR599081	Pacific Ocean	-12.9723	-96.0122	Upper Ocean
Pelagic	ERR599082	Indian Ocean	19.0284	64.5126	Upper Ocean
Pelagic	ERR599083	Pacific Ocean	-8.9729	-139.239	Mesopelagic Ocean
Pelagic	ERR599084	Pacific Ocean	-9.0714	-140.597	Upper Ocean
Pelagic	ERR599085	Pacific Ocean	-25.8076	-111.691	Mesopelagic Ocean
Pelagic	ERR599086	Pacific Ocean	-16.9486	-100.671	Mesopelagic Ocean
Pelagic	ERR599087	Pacific Ocean	6.3378	-102.954	Upper Ocean
Pelagic	ERR599088	Indian Ocean	-29.5019	37.9889	Upper Ocean
Pelagic	ERR599089	Pacific Ocean	-9.0714	-140.597	Upper Ocean
Pelagic	ERR599090	Southern Ocean	-62.0385	-49.529	Upper Ocean
Pelagic	ERR599091	Pacific Ocean	-8.9111	-142.557	Upper Ocean
Pelagic	ERR599092	Mediterranean Sea	35.7528	14.2765	Upper Ocean
Pelagic	ERR599093	Pacific Ocean	-25.8051	-111.72	Upper Ocean
Pelagic	ERR599094	Mediterranean Sea	39.3991	19.3997	Upper Ocean
Pelagic	ERR599095	Atlantic Ocean	36.5533	-6.5669	Upper Ocean
Pelagic	ERR599096	Pacific Ocean	-8.9729	-139.239	Mesopelagic Ocean
Pelagic	ERR599097	Indian Ocean	23.4183	37.245	Upper Ocean
Pelagic	ERR599098	Indian Ocean	-16.957	53.9801	Upper Ocean
Pelagic	ERR599099	Pacific Ocean	14.2075	-116.647	Upper Ocean
Pelagic	ERR599100	Atlantic Ocean	25.6168	-88.4532	Upper Ocean
Pelagic	ERR599101	Atlantic Ocean	-30.1484	-43.2705	Upper Ocean
Pelagic	ERR599102	Indian Ocean	19.0393	64.4913	Upper Ocean
Pelagic	ERR599103	Atlantic Ocean	-31.027	4.6802	Upper Ocean
Pelagic	ERR599104	Southern Ocean	-62.2231	-49.2139	Upper Ocean
Pelagic	ERR599105	Atlantic Ocean	-8.7789	-17.9099	Upper Ocean
Pelagic	ERR599106	Indian Ocean	27.16	27.1433	Upper Ocean
Pelagic	ERR599107	Atlantic Ocean	-34.8901	18.0459	Upper Ocean
Pelagic	ERR599108	Pacific Ocean	2.0299	-84.5546	Upper Ocean
Pelagic	ERR599109	Indian Ocean	19.0351	64.5638	Mesopelagic Ocean
Pelagic	ERR599110	Indian Ocean	-35.2421	26.3048	Upper Ocean
Pelagic	ERR599111	Indian Ocean	18.4417	39.8567	Upper Ocean
Pelagic	ERR599112	Indian Ocean	-15.3379	43.2948	Mesopelagic Ocean
Pelagic	ERR599113	Pacific Ocean	-12.9723	-96.0122	Upper Ocean
Pelagic	ERR599114	Pacific Ocean	-8.9111	-142.557	Upper Ocean
Pelagic	ERR599115	Pacific Ocean	35.2698	-127.727	Mesopelagic Ocean
Pelagic	ERR599116	Indian Ocean	23.36	37.2183	Upper Ocean
Pelagic	ERR599117	Pacific Ocean	-8.9109	-140.285	Upper Ocean
Pelagic	ERR599118	Pacific Ocean	1.9928	-84.5766	Upper Ocean
Pelagic	ERR599119	Pacific Ocean	-8.9111	-142.557	Upper Ocean
Pelagic	ERR599120	Pacific Ocean	-25.8051	-111.72	Upper Ocean
Pelagic	ERR599121	Southern Ocean	-62.2231	-49.2139	Upper Ocean
Pelagic	ERR599122	Atlantic Ocean	-47.2007	-57.9446	Upper Ocean
Pelagic	ERR599123	Atlantic Ocean	31.6948	-64.2489	Upper Ocean
Pelagic	ERR599124	Atlantic Ocean	-30.1471	-43.2915	Mesopelagic Ocean
Pelagic	ERR599125	Southern Ocean	-61.9689	-49.5017	Mesopelagic Ocean
Pelagic	ERR599126	Atlantic Ocean	-20.9354	-35.1803	Upper Ocean
Pelagic	ERR599127	Pacific Ocean	14.2025	-116.643	Mesopelagic Ocean
Pelagic	ERR599128	Pacific Ocean	-5.261	-85.1678	Mesopelagic Ocean
Pelagic	ERR599129	Atlantic Ocean	-31.0266	4.665	Upper Ocean
Pelagic	ERR599130	Indian Ocean	5.9998	73.9067	Upper Ocean
Pelagic	ERR599131	Atlantic Ocean	-31.0198	4.6685	Mesopelagic Ocean
Pelagic	ERR599132	Pacific Ocean	-5.261	-85.1678	Mesopelagic Ocean
Pelagic	ERR599133	Atlantic Ocean	-8.7296	-17.9604	Upper Ocean
Pelagic	ERR599134	Indian Ocean	21.9467	38.2517	Upper Ocean
Pelagic	ERR599135	Atlantic Ocean	-20.4091	-3.1759	Upper Ocean
Pelagic	ERR599136	Atlantic Ocean	25.5264	-88.394	Upper Ocean
Pelagic	ERR599137	Atlantic Ocean	-8.7296	-17.9604	Upper Ocean
Pelagic	ERR599138	Indian Ocean	-9.3921	66.4228	Upper Ocean
Pelagic	ERR599139	Indian Ocean	-16.957	53.9801	Upper Ocean
Pelagic	ERR599140	Mediterranean Sea	35.759	14.2574	Upper Ocean
Pelagic	ERR599141	Indian Ocean	6.0001	73.8955	Upper Ocean
Pelagic	ERR599142	Pacific Ocean	31.5213	-158.996	Upper Ocean
Pelagic	ERR599143	Indian Ocean	20.8183	63.5047	Upper Ocean
Pelagic	ERR599144	Atlantic Ocean	-32.2401	17.7103	Upper Ocean
Pelagic	ERR599145	Indian Ocean	18.5839	66.4727	Upper Ocean
Pelagic	ERR599146	Indian Ocean	-35.1728	26.2868	Upper Ocean
Pelagic	ERR599147	Pacific Ocean	14.2075	-116.647	Upper Ocean
Pelagic	ERR599148	Atlantic Ocean	-21.0292	-35.3498	Upper Ocean
Pelagic	ERR599149	Atlantic Ocean	-20.4075	-3.1641	Mesopelagic Ocean
Pelagic	ERR599150	Indian Ocean	-29.5019	37.9889	Upper Ocean
Pelagic	ERR599151	Pacific Ocean	-9.1504	-140.522	Upper Ocean
Pelagic	ERR599152	Pacific Ocean	14.2025	-116.643	Mesopelagic Ocean
Pelagic	ERR599153	Mediterranean Sea	39.3991	19.3997	Upper Ocean
Pelagic	ERR599154	Atlantic Ocean	-20.9315	-35.1794	Mesopelagic Ocean
Pelagic	ERR599155	Indian Ocean	23.36	37.2183	Upper Ocean
Pelagic	ERR599156	Pacific Ocean	-8.8999	-142.546	Upper Ocean
Pelagic	ERR599157	Pacific Ocean	-8.9109	-140.285	Upper Ocean
Pelagic	ERR599158	Indian Ocean	19.0393	64.4913	Upper Ocean
Pelagic	ERR599159	Atlantic Ocean	-30.1471	-43.2915	Mesopelagic Ocean
Pelagic	ERR599160	Pacific Ocean	-8.9068	-140.283	Upper Ocean
Pelagic	ERR599161	Pacific Ocean	-9.0714	-140.597	Upper Ocean
Pelagic	ERR599162	Pacific Ocean	7.4122	-79.3017	Upper Ocean
Pelagic	ERR599163	Pacific Ocean	-13.0023	-95.9759	Upper Ocean
Pelagic	ERR599164	Indian Ocean	-29.5046	37.9599	Mesopelagic Ocean
Pelagic	ERR599165	Atlantic Ocean	-20.4091	-3.1759	Upper Ocean
Pelagic	ERR599166	Atlantic Ocean	39.2392	-70.0343	Mesopelagic Ocean
Pelagic	ERR599167	Indian Ocean	19.0351	64.5638	Mesopelagic Ocean
Pelagic	ERR599168	Pacific Ocean	-5.2669	-85.2732	Upper Ocean
Pelagic	ERR599169	Pacific Ocean	-13.0023	-95.9759	Upper Ocean
Pelagic	ERR599170	Atlantic Ocean	35.9346	-37.3032	Upper Ocean
Pelagic	ERR599171	Atlantic Ocean	-31.0266	4.665	Upper Ocean
Pelagic	ERR599172	Indian Ocean	18.7341	66.3896	Mesopelagic Ocean
Pelagic	ERR599173	Atlantic Ocean	-34.9449	17.9189	Upper Ocean
Pelagic	ERR599174	Atlantic Ocean	-31.0266	4.665	Upper Ocean
Pelagic	ERR599175	Pacific Ocean	6.3559	-103.06	Mesopelagic Ocean
Pelagic	ERR599176	Southern Ocean	-62.0385	-49.529	Upper Ocean
Pelagic	ERR599233	Atlantic Ocean	-34.8901	18.0459	Upper Ocean
Pelagic	ERR599234	Atlantic Ocean	-47.1899	-58.2724	Upper Ocean
Pelagic	ERR599235	Atlantic Ocean	-34.8901	18.0459	Upper Ocean
Pelagic	ERR599236	Atlantic Ocean	-31.027	4.6802	Upper Ocean
Pelagic	ERR599237	Atlantic Ocean	-30.1367	-43.2899	Upper Ocean
Pelagic	ERR599238	Atlantic Ocean	-32.2401	17.7103	Upper Ocean
Pelagic	ERR599239	Southern Ocean	-62.2231	-49.2139	Upper Ocean
Pelagic	ERR599240	Atlantic Ocean	-30.1484	-43.2705	Upper Ocean
Pelagic	ERR599241	Atlantic Ocean	-20.4107	-3.1775	Upper Ocean
Pelagic	ERR599242	Atlantic Ocean	-34.8901	18.0459	Upper Ocean
Pelagic	ERR599243	Atlantic Ocean	-31.0507	4.6603	Upper Ocean
Pelagic	ERR599244	Indian Ocean	-29.5015	37.9946	Upper Ocean
Pelagic	ERR599245	Atlantic Ocean	-30.1506	-43.2877	Upper Ocean
Pelagic	ERR599246	Atlantic Ocean	-30.1471	-43.2915	Mesopelagic Ocean
Pelagic	ERR599247	Indian Ocean	-29.5018	37.9887	Upper Ocean
Pelagic	ERR599248	Atlantic Ocean	-31.0198	4.6685	Mesopelagic Ocean
Pelagic	ERR599249	Indian Ocean	-16.9534	53.9921	Upper Ocean
Pelagic	ERR599250	Atlantic Ocean	-30.2163	-43.275	Upper Ocean
Pelagic	ERR599251	Atlantic Ocean	-34.8901	18.0459	Upper Ocean
Pelagic	ERR599252	Atlantic Ocean	-34.8901	18.0459	Upper Ocean
Pelagic	ERR599253	Atlantic Ocean	-20.9354	-35.1803	Upper Ocean
Pelagic	ERR599254	Southern Ocean	-60.2287	-60.6476	Upper Ocean
Pelagic	ERR599255	Atlantic Ocean	-32.2164	17.705	Upper Ocean
Pelagic	ERR599256	Atlantic Ocean	-8.7484	-17.9179	Upper Ocean
Pelagic	ERR599257	Atlantic Ocean	-31.0266	4.665	Upper Ocean
Pelagic	ERR599258	Atlantic Ocean	-20.392	-3.2158	Upper Ocean
Pelagic	ERR599259	Atlantic Ocean	-31.0292	4.6742	Upper Ocean
Pelagic	ERR599260	Atlantic Ocean	-31.0198	4.6685	Mesopelagic Ocean
Pelagic	ERR599261	Atlantic Ocean	-34.9449	17.9189	Upper Ocean
Pelagic	ERR599262	Atlantic Ocean	-30.1443	-43.2559	Upper Ocean
Pelagic	ERR599263	Atlantic Ocean	-30.1872	-43.2834	Upper Ocean
Pelagic	ERR599264	Southern Ocean	-62.14	-49.3273	Upper Ocean
Pelagic	ERR599265	Atlantic Ocean	-30.1415	-43.2475	Upper Ocean
Pelagic	ERR599266	Indian Ocean	-29.5019	37.9889	Upper Ocean
Pelagic	ERR599267	Atlantic Ocean	-8.7789	-17.9099	Upper Ocean
Pelagic	ERR599268	Indian Ocean	-35.1889	26.2905	Mesopelagic Ocean
Pelagic	ERR599269	Atlantic Ocean	-32.1745	17.6991	Upper Ocean
Pelagic	ERR599270	Southern Ocean	-60.2287	-60.6476	Upper Ocean
Pelagic	ERR599271	Atlantic Ocean	-34.8901	18.0459	Upper Ocean
Pelagic	ERR599272	Atlantic Ocean	-34.8901	18.0459	Upper Ocean
Pelagic	ERR599273	Atlantic Ocean	-34.8901	18.0459	Upper Ocean
Pelagic	ERR599274	Atlantic Ocean	-34.8901	18.0459	Upper Ocean
Pelagic	ERR599275	Atlantic Ocean	-21.0292	-35.3498	Upper Ocean
Pelagic	ERR599276	Atlantic Ocean	-8.7789	-17.9099	Upper Ocean
Pelagic	ERR599277	Atlantic Ocean	-34.9363	17.9366	Upper Ocean
Pelagic	ERR599278	Atlantic Ocean	-30.1471	-43.2915	Mesopelagic Ocean
Pelagic	ERR599279	Atlantic Ocean	-47.2116	-58.0266	Upper Ocean
Pelagic	ERR599280	Indian Ocean	-16.957	53.9801	Upper Ocean
Pelagic	ERR599281	Southern Ocean	-62.0385	-49.529	Upper Ocean
Pelagic	ERR599282	Indian Ocean	-29.4991	37.9938	Upper Ocean
Pelagic	ERR599283	Southern Ocean	-60.3046	-60.5715	Upper Ocean
Pelagic	ERR599284	Atlantic Ocean	-31.027	4.6802	Upper Ocean
Pelagic	ERR599285	Atlantic Ocean	-34.8901	18.0459	Upper Ocean
Pelagic	ERR599286	Atlantic Ocean	-8.7826	-17.916	Upper Ocean
Pelagic	ERR599287	Atlantic Ocean	-8.7522	-17.9297	Upper Ocean
Pelagic	ERR599288	Southern Ocean	-62.2024	-49.2382	Upper Ocean
Pelagic	ERR599289	Atlantic Ocean	-34.8901	18.0459	Upper Ocean
Pelagic	ERR599290	Atlantic Ocean	-8.7296	-17.9604	Upper Ocean
Pelagic	ERR599291	Southern Ocean	-60.2584	-60.6226	Upper Ocean
Pelagic	ERR599292	Atlantic Ocean	-8.6926	-18.0002	Upper Ocean
Pelagic	ERR599293	Atlantic Ocean	-47.1863	-58.2902	Upper Ocean
Pelagic	ERR599294	Pacific Ocean	-16.9581	53.9767	Upper Ocean
Pelagic	ERR599295	Atlantic Ocean	-32.12	17.6987	Upper Ocean
Pelagic	ERR599296	Indian Ocean	-16.953	53.9825	Upper Ocean
Pelagic	ERR599297	Atlantic Ocean	-31.0266	4.665	Upper Ocean
Pelagic	ERR599298	Atlantic Ocean	-47.1863	-58.2902	Upper Ocean
Pelagic	ERR599299	Indian Ocean	-29.4964	37.9974	Upper Ocean
Pelagic	ERR599300	Atlantic Ocean	-34.8901	18.0459	Upper Ocean
Pelagic	ERR599301	Atlantic Ocean	-34.8986	18.03	Upper Ocean
Pelagic	ERR599302	Atlantic Ocean	-32.2401	17.7103	Upper Ocean
Pelagic	ERR599303	Atlantic Ocean	-21.0156	-35.3314	Upper Ocean
Pelagic	ERR599304	Atlantic Ocean	-31.0551	4.668	Upper Ocean
Pelagic	ERR599305	Atlantic Ocean	-20.4091	-3.1759	Upper Ocean
Pelagic	ERR599306	Atlantic Ocean	-47.1966	-58.2349	Upper Ocean
Pelagic	ERR599307	Atlantic Ocean	-8.7296	-17.9604	Upper Ocean
Pelagic	ERR599308	Atlantic Ocean	-34.8901	18.0459	Upper Ocean
Pelagic	ERR599309	Atlantic Ocean	-20.9354	-35.1803	Upper Ocean
Pelagic	ERR599310	Southern Ocean	-62.1943	-49.2502	Upper Ocean
Pelagic	ERR599311	Atlantic Ocean	-30.1367	-43.2899	Upper Ocean
Pelagic	ERR599312	Indian Ocean	-35.1889	26.2891	Upper Ocean
Pelagic	ERR599313	Atlantic Ocean	-20.4035	-3.1859	Upper Ocean
Pelagic	ERR599314	Indian Ocean	-16.9672	53.9337	Upper Ocean
Pelagic	ERR599315	Atlantic Ocean	-34.8901	18.0459	Upper Ocean
Pelagic	ERR599316	Atlantic Ocean	-34.8901	18.0459	Upper Ocean
Pelagic	ERR599317	Atlantic Ocean	-8.6831	-18.0095	Upper Ocean
Pelagic	ERR599318	Atlantic Ocean	-34.8901	18.0459	Upper Ocean
Pelagic	ERR599319	Atlantic Ocean	-47.2007	-57.9446	Upper Ocean
Pelagic	ERR599320	Indian Ocean	-35.2351	26.3022	Upper Ocean
Pelagic	ERR599321	Indian Ocean	-29.4985	37.9926	Upper Ocean
Pelagic	ERR599322	Atlantic Ocean	-30.1484	-43.2705	Upper Ocean
Pelagic	ERR599323	Indian Ocean	-35.2421	26.3048	Upper Ocean
Pelagic	ERR599324	Indian Ocean	-29.5333	37.9117	Upper Ocean
Pelagic	ERR599325	Southern Ocean	-62.2231	-49.2139	Upper Ocean
Pelagic	ERR599326	Atlantic Ocean	-20.9514	-35.2273	Upper Ocean
Pelagic	ERR599327	Atlantic Ocean	-34.8901	18.0459	Upper Ocean
Pelagic	ERR599328	Indian Ocean	-16.9534	53.9601	Upper Ocean
Pelagic	ERR599329	Atlantic Ocean	-21.092	-35.417	Upper Ocean
Pelagic	ERR599330	Atlantic Ocean	-21.0292	-35.3498	Upper Ocean
Pelagic	ERR599331	Atlantic Ocean	-20.4091	-3.1759	Upper Ocean
Pelagic	ERR599332	Atlantic Ocean	-20.9724	-35.2724	Upper Ocean
Pelagic	ERR599333	Atlantic Ocean	-21.0874	-35.412	Upper Ocean
Pelagic	ERR599334	Atlantic Ocean	-34.8901	18.0459	Upper Ocean
Pelagic	ERR599335	Southern Ocean	-62.0385	-49.529	Upper Ocean
Pelagic	ERR599336	Atlantic Ocean	-20.9406	-35.196	Upper Ocean
Pelagic	ERR599337	Pacific Ocean	-8.9111	-142.557	Upper Ocean
Pelagic	ERR599338	Pacific Ocean	-8.8999	-142.546	Upper Ocean
Pelagic	ERR599339	Indian Ocean	-22.3368	40.3412	Upper Ocean
Pelagic	ERR599340	Pacific Ocean	14.2075	-116.647	Upper Ocean
Pelagic	ERR599341	Pacific Ocean	-8.9729	-139.239	Mesopelagic Ocean
Pelagic	ERR599342	Pacific Ocean	-13.0023	-95.9759	Upper Ocean
Pelagic	ERR599343	Pacific Ocean	-8.896	-140.286	Upper Ocean
Pelagic	ERR599344	Indian Ocean	-9.3921	66.4228	Upper Ocean
Pelagic	ERR599345	Pacific Ocean	6.3378	-102.954	Upper Ocean
Pelagic	ERR599346	Pacific Ocean	-5.261	-85.1678	Mesopelagic Ocean
Pelagic	ERR599347	Atlantic Ocean	-20.9315	-35.1794	Mesopelagic Ocean
Pelagic	ERR599348	Pacific Ocean	-8.9109	-140.285	Upper Ocean
Pelagic	ERR599349	Pacific Ocean	-5.2669	-85.2732	Upper Ocean
Pelagic	ERR599350	Indian Ocean	21.9467	38.2517	Upper Ocean
Pelagic	ERR599351	Indian Ocean	-29.5046	37.9599	Mesopelagic Ocean
Pelagic	ERR599352	Southern Ocean	-60.2287	-60.6476	Upper Ocean
Pelagic	ERR599353	Pacific Ocean	-5.2529	-85.1545	Upper Ocean
Pelagic	ERR599354	Pacific Ocean	-9.1504	-140.522	Upper Ocean
Pelagic	ERR599355	Pacific Ocean	6.3332	-102.943	Upper Ocean
Pelagic	ERR599356	Indian Ocean	0.0033	71.6428	Upper Ocean
Pelagic	ERR599357	Pacific Ocean	-16.9601	-100.633	Upper Ocean
Pelagic	ERR599358	Indian Ocean	-16.957	53.9801	Upper Ocean
Pelagic	ERR599359	Pacific Ocean	-12.9723	-96.0122	Upper Ocean
Pelagic	ERR599360	Indian Ocean	18.7341	66.3896	Mesopelagic Ocean
Pelagic	ERR599361	Atlantic Ocean	-30.1471	-43.2915	Mesopelagic Ocean
Pelagic	ERR599362	Indian Ocean	-17.2855	42.2866	Upper Ocean
Pelagic	ERR599363	Pacific Ocean	14.2035	-116.626	Upper Ocean
Pelagic	ERR599364	Southern Ocean	-62.0385	-49.529	Upper Ocean
Pelagic	ERR599365	Pacific Ocean	6.3559	-103.06	Mesopelagic Ocean
Pelagic	ERR599366	Pacific Ocean	14.2025	-116.643	Mesopelagic Ocean
Pelagic	ERR599367	Pacific Ocean	-9.0714	-140.597	Upper Ocean
Pelagic	ERR599368	Pacific Ocean	-16.9486	-100.671	Mesopelagic Ocean
Pelagic	ERR599369	Pacific Ocean	-16.9587	-100.675	Upper Ocean
Pelagic	ERR599370	Atlantic Ocean	-20.9315	-35.1794	Mesopelagic Ocean
Pelagic	ERR599371	Indian Ocean	-15.3379	43.2948	Mesopelagic Ocean
Pelagic	ERR599372	Indian Ocean	20.8457	63.5851	Mesopelagic Ocean
Pelagic	ERR599373	Southern Ocean	-61.9689	-49.5017	Mesopelagic Ocean
Pelagic	ERR599374	Atlantic Ocean	-30.1484	-43.2705	Upper Ocean
Pelagic	ERR599375	Pacific Ocean	-12.9794	-96.0232	Upper Ocean
Pelagic	ERR599376	Indian Ocean	-15.3424	43.2965	Upper Ocean
Pelagic	ERR599377	Pacific Ocean	-9.0063	-139.139	Upper Ocean
Pelagic	ERR599378	Pacific Ocean	-8.8951	-140.317	Upper Ocean
Pelagic	ERR599379	Indian Ocean	19.0351	64.5638	Mesopelagic Ocean
Pelagic	ERR599380	Pacific Ocean	-8.9971	-139.196	Upper Ocean
Pelagic	ERR599382	Atlantic Ocean	-31.0198	4.6685	Mesopelagic Ocean
Pelagic	ERR599383	Mediterranean Sea	41.6686	2.7996	Upper Ocean
Pelagic	ERR599384	Atlantic Ocean	-47.1863	-58.2902	Upper Ocean
Pelagic	ERR634968	Pacific Ocean	-8.9068	-140.283	Upper Ocean
Pelagic	ERR676906	Atlantic Ocean	52.965	0.923	Upper Ocean
Pelagic	ERR694110	Pacific Ocean	45.9332	-130.014	Dark Ocean
Pelagic	ERR694111	Pacific Ocean	45.9332	-130.014	Dark Ocean
Pelagic	ERR694112	Pacific Ocean	45.9332	-130.014	Dark Ocean
Pelagic	ERR694113	Pacific Ocean	45.9332	-130.014	Dark Ocean
Pelagic	ERR694114	Pacific Ocean	45.9332	-130.014	Dark Ocean
Pelagic	ERR694115	Pacific Ocean	45.9332	-130.014	Dark Ocean
Pelagic	ERR694116	Pacific Ocean	45.9332	-130.014	Dark Ocean
Pelagic	ERR694117	Pacific Ocean	45.9332	-130.014	Dark Ocean
Pelagic	ERR694118	Pacific Ocean	45.9332	-130.014	Dark Ocean
Pelagic	ERR694119	Pacific Ocean	45.9332	-130.014	Dark Ocean
Pelagic	ERR694120	Pacific Ocean	45.9332	-130.014	Dark Ocean
Pelagic	ERR694121	Pacific Ocean	45.9332	-130.014	Dark Ocean
Pelagic	ERR694122	Pacific Ocean	45.9332	-130.014	Dark Ocean
Pelagic	ERR694123	Pacific Ocean	45.9332	-130.014	Dark Ocean
Pelagic	ERR694124	Pacific Ocean	45.9332	-130.014	Dark Ocean
Pelagic	ERR694125	Pacific Ocean	45.9332	-130.014	Dark Ocean
Pelagic	ERR694126	Pacific Ocean	45.9332	-130.014	Dark Ocean
Pelagic	ERR694127	Pacific Ocean	45.9266	-129.979	Dark Ocean
Pelagic	ERR694128	Pacific Ocean	45.9266	-129.979	Dark Ocean
Pelagic	ERR694129	Pacific Ocean	45.9266	-129.979	Dark Ocean
Pelagic	ERR694130	Pacific Ocean	45.9266	-129.979	Dark Ocean
Pelagic	ERR694131	Pacific Ocean	45.9266	-129.979	Dark Ocean
Pelagic	ERR694132	Pacific Ocean	45.9266	-129.979	Dark Ocean
Pelagic	ERR694133	Pacific Ocean	45.9266	-129.979	Dark Ocean
Pelagic	ERR694134	Pacific Ocean	45.9266	-129.979	Dark Ocean
Pelagic	ERR694135	Pacific Ocean	45.9266	-129.979	Dark Ocean
Pelagic	ERR694136	Pacific Ocean	45.9266	-129.979	Dark Ocean
Pelagic	ERR694137	Pacific Ocean	45.9266	-129.979	Dark Ocean
Pelagic	ERR694138	Pacific Ocean	45.9266	-129.979	Dark Ocean
Pelagic	ERR694139	Pacific Ocean	45.9266	-129.979	Dark Ocean
Pelagic	ERR694141	Pacific Ocean	45.9266	-129.979	Dark Ocean
Pelagic	ERR694142	Pacific Ocean	45.9266	-129.979	Dark Ocean
Pelagic	ERR694143	Pacific Ocean	45.9266	-129.979	Dark Ocean
Pelagic	ERR694144	Pacific Ocean	45.9266	-129.979	Dark Ocean
Pelagic	ERR694145	Pacific Ocean	45.9266	-129.979	Dark Ocean
Pelagic	ERR694146	Pacific Ocean	45.9266	-129.979	Dark Ocean
Pelagic	ERR694147	Pacific Ocean	45.9266	-129.979	Dark Ocean
Pelagic	ERR694148	Pacific Ocean	45.9266	-129.979	Dark Ocean
Pelagic	ERR694149	Pacific Ocean	45.9266	-129.979	Dark Ocean
Pelagic	ERR694150	Pacific Ocean	45.9266	-129.979	Dark Ocean
Pelagic	ERR694151	Pacific Ocean	45.9266	-129.979	Dark Ocean
Pelagic	ERR694152	Pacific Ocean	45.9266	-129.979	Dark Ocean
Pelagic	ERR694153	Pacific Ocean	45.9437	-129.985	Dark Ocean
Pelagic	ERR694154	Pacific Ocean	45.9437	-129.985	Dark Ocean
Pelagic	ERR694155	Pacific Ocean	45.9437	-129.985	Dark Ocean
Pelagic	ERR694156	Pacific Ocean	45.9437	-129.985	Dark Ocean
Pelagic	ERR694157	Pacific Ocean	45.9437	-129.985	Dark Ocean
Pelagic	ERR694158	Pacific Ocean	45.9437	-129.985	Dark Ocean
Pelagic	ERR694159	Pacific Ocean	45.9437	-129.985	Dark Ocean
Pelagic	ERR694160	Pacific Ocean	45.9437	-129.985	Dark Ocean
Pelagic	ERR694161	Pacific Ocean	45.9437	-129.985	Dark Ocean
Pelagic	ERR694162	Pacific Ocean	45.9437	-129.985	Dark Ocean
Pelagic	ERR694163	Pacific Ocean	45.9437	-129.985	Dark Ocean
Pelagic	ERR694164	Pacific Ocean	45.9437	-129.985	Dark Ocean
Pelagic	ERR694165	Pacific Ocean	45.9437	-129.985	Dark Ocean
Pelagic	ERR694166	Pacific Ocean	45.9437	-129.985	Dark Ocean
Pelagic	ERR694167	Pacific Ocean	45.9437	-129.985	Dark Ocean
Pelagic	ERR694168	Pacific Ocean	45.9437	-129.985	Dark Ocean
Pelagic	ERR694169	Pacific Ocean	45.9437	-129.985	Dark Ocean
Pelagic	ERR694170	Pacific Ocean	45.9437	-129.985	Dark Ocean
Pelagic	ERR694171	Pacific Ocean	45.9437	-129.985	Dark Ocean
Pelagic	ERR694172	Pacific Ocean	45.9437	-129.985	Dark Ocean
Pelagic	ERR694173	Pacific Ocean	45.9437	-129.985	Dark Ocean
Pelagic	ERR694174	Pacific Ocean	45.9437	-129.985	Dark Ocean
Pelagic	ERR694175	Pacific Ocean	45.9437	-129.985	Dark Ocean
Pelagic	ERR694176	Pacific Ocean	45.8799	-129.803	Dark Ocean
Pelagic	ERR694177	Pacific Ocean	45.8799	-129.803	Dark Ocean
Pelagic	ERR694178	Pacific Ocean	45.8799	-129.803	Dark Ocean
Pelagic	ERR694179	Pacific Ocean	45.8799	-129.803	Dark Ocean
Pelagic	ERR694180	Pacific Ocean	45.8799	-129.803	Dark Ocean
Pelagic	ERR694181	Pacific Ocean	45.8799	-129.803	Dark Ocean
Pelagic	ERR694182	Pacific Ocean	45.8799	-129.803	Dark Ocean
Pelagic	ERR694183	Pacific Ocean	45.8799	-129.803	Dark Ocean
Pelagic	ERR694184	Pacific Ocean	45.8799	-129.803	Dark Ocean
Pelagic	ERR694185	Pacific Ocean	45.8799	-129.803	Dark Ocean
Pelagic	ERR694186	Pacific Ocean	45.8799	-129.803	Dark Ocean
Pelagic	ERR694187	Pacific Ocean	45.8799	-129.803	Dark Ocean
Pelagic	ERR694188	Pacific Ocean	45.8799	-129.803	Dark Ocean
Pelagic	ERR694189	Pacific Ocean	45.8799	-129.803	Dark Ocean
Pelagic	ERR694190	Pacific Ocean	45.8799	-129.803	Dark Ocean
Pelagic	ERR694191	Pacific Ocean	45.8799	-129.803	Dark Ocean
Pelagic	ERR694192	Pacific Ocean	45.8799	-129.803	Dark Ocean
Pelagic	ERR694193	Pacific Ocean	45.8799	-129.803	Dark Ocean
Pelagic	ERR694194	Pacific Ocean	45.8799	-129.803	Dark Ocean
Pelagic	ERR694195	Pacific Ocean	45.8799	-129.803	Dark Ocean
Pelagic	ERR694196	Pacific Ocean	45.8799	-129.803	Dark Ocean
Pelagic	ERR694197	Pacific Ocean	45.8799	-129.803	Dark Ocean
Pelagic	ERR694199	Pacific Ocean	45.9332	-129.982	Dark Ocean
Pelagic	ERR694200	Pacific Ocean	45.9332	-129.982	Dark Ocean
Pelagic	ERR694201	Pacific Ocean	45.9332	-129.982	Dark Ocean
Pelagic	ERR694202	Pacific Ocean	45.9332	-129.982	Dark Ocean
Pelagic	ERR694203	Pacific Ocean	45.9332	-129.982	Dark Ocean
Pelagic	ERR694204	Pacific Ocean	45.9332	-129.982	Dark Ocean
Pelagic	ERR694205	Pacific Ocean	45.9332	-129.982	Dark Ocean
Pelagic	ERR694206	Pacific Ocean	45.9332	-129.982	Dark Ocean
Pelagic	ERR694207	Pacific Ocean	45.9227	-129.988	Dark Ocean
Pelagic	ERR694208	Pacific Ocean	45.9227	-129.988	Dark Ocean
Pelagic	ERR694209	Pacific Ocean	45.9227	-129.988	Dark Ocean
Pelagic	ERR694210	Pacific Ocean	45.9227	-129.988	Dark Ocean
Pelagic	ERR694211	Pacific Ocean	45.9227	-129.988	Dark Ocean
Pelagic	ERR694212	Pacific Ocean	45.9227	-129.988	Dark Ocean
Pelagic	ERR694213	Pacific Ocean	45.9227	-129.988	Dark Ocean
Pelagic	ERR731874	Atlantic Ocean	52.965	0.923	Upper Ocean
Pelagic	ERR731876	Atlantic Ocean	52.965	0.923	Upper Ocean
Pelagic	ERR731877	Atlantic Ocean	52.965	0.923	Upper Ocean
Pelagic	ERR770958	Mediterranean Sea	45.7009	13.71	Upper Ocean
Pelagic	ERR770959	Atlantic Ocean	38.64	-28.13	Upper Ocean
Pelagic	ERR770960	Atlantic Ocean	38.5297	-28.6018	Upper Ocean
Pelagic	ERR770961	Atlantic Ocean	37.4257	-25.3156	Upper Ocean
Pelagic	ERR770962	Indian Ocean	1.2685	103.917	Upper Ocean
Pelagic	ERR770963	Mediterranean Sea	35.0864	-2.21466	Upper Ocean
Pelagic	ERR770964	Atlantic Ocean	33.2596	-8.49922	Upper Ocean
Pelagic	ERR770965	Atlantic Ocean	33.5839	-7.70064	Upper Ocean
Pelagic	ERR770966	Atlantic Ocean	32.7467	-9.03667	Upper Ocean
Pelagic	ERR770968	Pacific Ocean	33.55	-118.4	Upper Ocean
Pelagic	ERR770969	Atlantic Ocean	37.0051	-7.97312	Upper Ocean
Pelagic	ERR770970	Arctic Ocean	74.31	-20.3043	Upper Ocean
Pelagic	ERR770971	Arctic Ocean	74.31	-20.3043	Upper Ocean
Pelagic	ERR770972	Mediterranean Sea	43.57	13.595	Upper Ocean
Pelagic	ERR770973	Mediterranean Sea	43.8514	13.0731	Upper Ocean
Pelagic	ERR770974	Mediterranean Sea	43.9475	12.935	Upper Ocean
Pelagic	ERR770975	Atlantic Ocean	41.1416	-8.6668	Upper Ocean
Pelagic	ERR770976	Atlantic Ocean	41.6835	-8.8341	Upper Ocean
Pelagic	ERR770977	Atlantic Ocean	54.8333	10	Upper Ocean
Pelagic	ERR770978	Pacific Ocean	-45.7442	170.771	Upper Ocean
Pelagic	ERR770979	Atlantic Ocean	45.4142	12.4378	Upper Ocean
Pelagic	ERR770980	Pacific Ocean	-17.2894	-149.54	Upper Ocean
Pelagic	ERR770981	Atlantic Ocean	45.4568	12.2605	Upper Ocean
Pelagic	ERR770982	Pacific Ocean	-36.2928	174.819	Upper Ocean
Pelagic	ERR770983	Mediterranean Sea	46.4415	30.776	Upper Ocean
Pelagic	ERR770984	Atlantic Ocean	45.3143	12.5083	Upper Ocean
Pelagic	ERR770985	Atlantic Ocean	53.2254	-4.15903	Upper Ocean
Pelagic	ERR770986	Atlantic Ocean	41.5245	-70.6722	Upper Ocean
Pelagic	ERR770987	Atlantic Ocean	33.3231	-79.1676	Upper Ocean
Pelagic	ERR770988	Mediterranean Sea	41.6666	2.8	Upper Ocean
Pelagic	ERR770989	Atlantic Ocean	34.7181	-76.6707	Upper Ocean
Pelagic	ERR770990	Pacific Ocean	21.2866	-157.844	Upper Ocean
Pelagic	ERR770991	Pacific Ocean	21.2888	-156.864	Upper Ocean
Pelagic	ERR770992	Atlantic Ocean	43.8604	-69.5781	Upper Ocean
Pelagic	ERR770993	Atlantic Ocean	43.8444	-69.6409	Upper Ocean
Pelagic	ERR770994	Indian Ocean	27.0415	33.907	Upper Ocean
Pelagic	ERR770995	Indian Ocean	27.0253	33.9126	Upper Ocean
Pelagic	ERR770996	Pacific Ocean	9.3485	-82.266	Upper Ocean
Pelagic	ERR770997	Atlantic Ocean	43.3333	-1.925	Upper Ocean
Pelagic	ERR770998	Mediterranean Sea	35.661	24.99	Upper Ocean
Pelagic	ERR770999	Mediterranean Sea	35.661	24.99	Upper Ocean
Pelagic	ERR771000	Mediterranean Sea	45.3256	13.3319	Upper Ocean
Pelagic	ERR771001	Atlantic Ocean	45.4125	12.5265	Upper Ocean
Pelagic	ERR771002	Atlantic Ocean	45.502	12.4176	Upper Ocean
Pelagic	ERR771004	Atlantic Ocean	27.6158	-82.7259	Upper Ocean
Pelagic	ERR771005	Pacific Ocean	32.867	-117.257	Upper Ocean
Pelagic	ERR771008	Mediterranean Sea	40.808	14.25	Upper Ocean
Pelagic	ERR771009	Atlantic Ocean	32.7524	79.8995	Upper Ocean
Pelagic	ERR771010	Atlantic Ocean	24.7449	-80.7837	Upper Ocean
Pelagic	ERR771011	Atlantic Ocean	26.1029	-80.0931	Upper Ocean
Pelagic	ERR771012	Atlantic Ocean	39.3322	-75.4699	Upper Ocean
Pelagic	ERR771013	Atlantic Ocean	38.6792	-76.1742	Upper Ocean
Pelagic	ERR771014	Mediterranean Sea	31.2167	29.9667	Upper Ocean
Pelagic	ERR771015	Atlantic Ocean	59.8822	23.2538	Upper Ocean
Pelagic	ERR771016	Atlantic Ocean	54.1819	7.9	Upper Ocean
Pelagic	ERR771017	Atlantic Ocean	27.4694	-80.2834	Upper Ocean
Pelagic	ERR771018	Indian Ocean	16.8026	88.0816	Upper Ocean
Pelagic	ERR771019	Atlantic Ocean	35.82	-5.75	Upper Ocean
Pelagic	ERR771020	Mediterranean Sea	35.0864	-2.21466	Upper Ocean
Pelagic	ERR771021	Mediterranean Sea	35.1927	-2.88005	Upper Ocean
Pelagic	ERR771022	Mediterranean Sea	43.2264	5.74583	Upper Ocean
Pelagic	ERR771023	Mediterranean Sea	45.08	13.61	Upper Ocean
Pelagic	ERR771024	Arctic Ocean	64.2083	-22.015	Upper Ocean
Pelagic	ERR771025	Arctic Ocean	64.2083	-22.015	Upper Ocean
Pelagic	ERR771026	Atlantic Ocean	48.7778	-3.9375	Upper Ocean
Pelagic	ERR771027	Mediterranean Sea	35	33	Upper Ocean
Pelagic	ERR771029	Atlantic Ocean	51.4816	2.45148	Upper Ocean
Pelagic	ERR771030	Atlantic Ocean	51.6829	2.4152	Upper Ocean
Pelagic	ERR771031	Atlantic Ocean	51.7484	2.698	Upper Ocean
Pelagic	ERR771032	Atlantic Ocean	51.4584	2.35047	Upper Ocean
Pelagic	ERR771033	Mediterranean Sea	35.3637	33.2897	Upper Ocean
Pelagic	ERR771034	Atlantic Ocean	51.5803	2.7897	Upper Ocean
Pelagic	ERR771035	Atlantic Ocean	51.1857	2.70167	Upper Ocean
Pelagic	ERR771036	Atlantic Ocean	51.2777	2.6135	Upper Ocean
Pelagic	ERR771037	Atlantic Ocean	51.3348	2.50215	Upper Ocean
Pelagic	ERR771038	Atlantic Ocean	51.4716	3.05917	Upper Ocean
Pelagic	ERR771039	Atlantic Ocean	51.441	3.13995	Upper Ocean
Pelagic	ERR771040	Atlantic Ocean	51.3749	3.21833	Upper Ocean
Pelagic	ERR771041	Atlantic Ocean	51.3073	2.84933	Upper Ocean
Pelagic	ERR771042	Atlantic Ocean	51.2695	2.9047	Upper Ocean
Pelagic	ERR771043	Atlantic Ocean	51.4347	2.81087	Upper Ocean
Pelagic	ERR771044	Atlantic Ocean	51.7961	1.01296	Upper Ocean
Pelagic	ERR771045	Mediterranean Sea	38.4133	27.0342	Upper Ocean
Pelagic	ERR771046	Arctic Ocean	65.7064	-18.1181	Upper Ocean
Pelagic	ERR771047	Mediterranean Sea	43.4325	2.89966	Upper Ocean
Pelagic	ERR771048	Atlantic Ocean	57.8498	-5.6495	Upper Ocean
Pelagic	ERR771049	Atlantic Ocean	58.957	-2.9726	Upper Ocean
Pelagic	ERR771050	Atlantic Ocean	56.9631	-2.1031	Upper Ocean
Pelagic	ERR771051	Atlantic Ocean	48.359	-4.552	Upper Ocean
Pelagic	ERR771052	Atlantic Ocean	37.4328	-25.19	Upper Ocean
Pelagic	ERR771053	Atlantic Ocean	59.622	10.6282	Upper Ocean
Pelagic	ERR771054	Atlantic Ocean	59.8996	10.72	Upper Ocean
Pelagic	ERR771055	Atlantic Ocean	59.8162	10.5986	Upper Ocean
Pelagic	ERR771056	Atlantic Ocean	44.6667	-1.16666	Upper Ocean
Pelagic	ERR771057	Atlantic Ocean	36.9977	-7.97312	Upper Ocean
Pelagic	ERR771058	Atlantic Ocean	44.6936	-63.6403	Upper Ocean
Pelagic	ERR771059	Atlantic Ocean	44.6936	-63.6403	Upper Ocean
Pelagic	ERR771061	Atlantic Ocean	-34.6759	-54.2752	Upper Ocean
Pelagic	ERR771062	Mediterranean Sea	41.1667	18.5833	Upper Ocean
Pelagic	ERR771063	Mediterranean Sea	41.1667	18.5833	Upper Ocean
Pelagic	ERR771064	Atlantic Ocean	-34.37	-54.16	Upper Ocean
Pelagic	ERR771065	Atlantic Ocean	53.5809	8.14864	Upper Ocean
Pelagic	ERR771066	Pacific Ocean	8.5216	81.0521	Upper Ocean
Pelagic	ERR771067	Arctic Ocean	78.4533	-2.82967	Upper Ocean
Pelagic	ERR771068	Atlantic Ocean	51.3614	3.11886	Upper Ocean
Pelagic	ERR771069	Pacific Ocean	21.2688	-157.722	Upper Ocean
Pelagic	ERR771070	Atlantic Ocean	31.9828	-81.0167	Upper Ocean
Pelagic	ERR771071	Atlantic Ocean	31.3836	-80.8667	Upper Ocean
Pelagic	ERR771072	Atlantic Ocean	60.1612	5.11504	Upper Ocean
Pelagic	ERR771073	Mediterranean Sea	42.49	3.15	Upper Ocean
Pelagic	ERR771074	Atlantic Ocean	-33.8971	18.3868	Upper Ocean
Pelagic	ERR771075	Mediterranean Sea	32.0694	34.843	Upper Ocean
Pelagic	ERR771076	Mediterranean Sea	42.2449	27.4008	Upper Ocean
Pelagic	ERR771077	Arctic Ocean	66.1316	-18.7902	Upper Ocean
Pelagic	ERR771078	Mediterranean Sea	43.1758	27.9086	Upper Ocean
Pelagic	ERR771079	Atlantic Ocean	65.8172	-8.10183	Upper Ocean
Pelagic	ERR771080	Arctic Ocean	65.4886	-18.0608	Upper Ocean
Pelagic	ERR771081	Arctic Ocean	66.0078	-18.1953	Upper Ocean
Pelagic	ERR771082	Arctic Ocean	66.0069	-18.1965	Upper Ocean
Pelagic	ERR771083	Atlantic Ocean	55.0331	-1.43278	Upper Ocean
Pelagic	ERR771084	Pacific Ocean	34.3244	135.121	Upper Ocean
Pelagic	ERR771085	Mediterranean Sea	32.822	32.954	Upper Ocean
Pelagic	ERR771086	Indian Ocean	29.4667	34.9291	Upper Ocean
Pelagic	ERR771087	Atlantic Ocean	51.7423	-8.3112	Upper Ocean
Pelagic	ERR771088	Atlantic Ocean	37.167	-7.504	Upper Ocean
Pelagic	ERR771089	Atlantic Ocean	39.4151	-9.21883	Upper Ocean
Pelagic	ERR771090	Atlantic Ocean	39.1343	-9.38478	Upper Ocean
Pelagic	ERR771091	Atlantic Ocean	34.41	-9.51	Upper Ocean
Pelagic	ERR771092	Atlantic Ocean	38.6667	-9.4367	Upper Ocean
Pelagic	ERR771093	Atlantic Ocean	40.6599	-8.70376	Upper Ocean
Pelagic	ERR771094	Atlantic Ocean	40.1451	-8.86933	Upper Ocean
Pelagic	ERR771095	Atlantic Ocean	38.6769	-9.01236	Upper Ocean
Pelagic	ERR771096	Atlantic Ocean	38.7573	-8.96633	Upper Ocean
Pelagic	ERR771097	Atlantic Ocean	39.1404	-9.38011	Upper Ocean
Pelagic	ERR771098	Arctic Ocean	65.9449	-22.4192	Upper Ocean
Pelagic	ERR771099	Arctic Ocean	65.9449	-22.4192	Upper Ocean
Pelagic	ERR771100	Pacific Ocean	69.0233	-105.343	Upper Ocean
Pelagic	ERR771101	Atlantic Ocean	32.7747	-16.8286	Upper Ocean
Pelagic	ERR771102	Atlantic Ocean	32.6461	-16.9102	Upper Ocean
Pelagic	ERR771103	Atlantic Ocean	32.7418	-16.7113	Upper Ocean
Pelagic	ERR771104	Mediterranean Sea	35.35	25.29	Upper Ocean
Pelagic	ERR771105	Atlantic Ocean	41.8398	-83.1899	Upper Ocean
Pelagic	ERR771106	Atlantic Ocean	50.151	-4.13	Upper Ocean
Pelagic	ERR845264	Atlantic Ocean	41.132	-8.71004	Upper Ocean
Pelagic	ERR845265	Atlantic Ocean	41.132	-8.71004	Upper Ocean
Pelagic	ERR855786	Arctic Ocean	60.1433	-1.2825	Upper Ocean
Pelagic	ERR864069	Pacific Ocean	46.234	-123.909	Upper Ocean
Pelagic	ERR864070	Pacific Ocean	46.234	-123.909	Upper Ocean
Pelagic	ERR864075	Pacific Ocean	46.233	-124.16	Upper Ocean
Pelagic	ERR864076	Pacific Ocean	46.233	-124.16	Upper Ocean
Pelagic	ERR868346	Pacific Ocean	32.931	-121.865	Upper Ocean
Pelagic	ERR868347	Pacific Ocean	6.671	-153.066	Upper Ocean
Pelagic	ERR868348	Indian Ocean	23.4183	37.245	Upper Ocean
Pelagic	ERR868349	Atlantic Ocean	29.8556	-79.6493	Mesopelagic Ocean
Pelagic	ERR868350	Indian Ocean	-17.2855	42.2866	Upper Ocean
Pelagic	ERR868351	Atlantic Ocean	34.6712	-71.3093	Upper Ocean
Pelagic	ERR868352	Pacific Ocean	-8.9111	-142.557	Upper Ocean
Pelagic	ERR868353	Indian Ocean	19.0351	64.5638	Mesopelagic Ocean
Pelagic	ERR868354	Atlantic Ocean	35.9346	-37.3032	Upper Ocean
Pelagic	ERR868355	Indian Ocean	-9.3921	66.4228	Upper Ocean
Pelagic	ERR868356	Mediterranean Sea	39.3888	19.3905	Upper Ocean
Pelagic	ERR868357	Pacific Ocean	-5.2529	-85.1545	Upper Ocean
Pelagic	ERR868358	Pacific Ocean	-33.9116	-73.0537	Upper Ocean
Pelagic	ERR868359	Pacific Ocean	-8.8999	-142.546	Upper Ocean
Pelagic	ERR868360	Pacific Ocean	-8.9109	-140.285	Upper Ocean
Pelagic	ERR868361	Southern Ocean	-64.3183	-53.1081	Upper Ocean
Pelagic	ERR868362	Pacific Ocean	-5.261	-85.1678	Mesopelagic Ocean
Pelagic	ERR868363	Pacific Ocean	-9.1504	-140.522	Upper Ocean
Pelagic	ERR868364	Pacific Ocean	-1.9002	-84.6265	Upper Ocean
Pelagic	ERR868365	Pacific Ocean	-23.2232	-129.599	Mesopelagic Ocean
Pelagic	ERR868366	Atlantic Ocean	33.061	-66.5435	Upper Ocean
Pelagic	ERR868367	Atlantic Ocean	25.6168	-88.4532	Upper Ocean
Pelagic	ERR868368	Indian Ocean	18.5745	66.4895	Upper Ocean
Pelagic	ERR868369	Atlantic Ocean	36.5533	-6.5669	Upper Ocean
Pelagic	ERR868370	Pacific Ocean	-21.4689	54.3066	Upper Ocean
Pelagic	ERR868371	Pacific Ocean	-9.0714	-140.597	Upper Ocean
Pelagic	ERR868372	Atlantic Ocean	-44.5342	-52.455	Upper Ocean
Pelagic	ERR868373	Mediterranean Sea	36.0469	-4.3555	Upper Ocean
Pelagic	ERR868374	Pacific Ocean	1.9928	-84.5766	Upper Ocean
Pelagic	ERR868376	Southern Ocean	-64.3595	-53.0063	Upper Ocean
Pelagic	ERR868377	Pacific Ocean	0.0063	-84.585	Mesopelagic Ocean
Pelagic	ERR868378	Pacific Ocean	17.0854	-118.891	Upper Ocean
Pelagic	ERR868379	Pacific Ocean	-25.8076	-111.691	Mesopelagic Ocean
Pelagic	ERR868380	Atlantic Ocean	34.0771	-49.8233	Mesopelagic Ocean
Pelagic	ERR868381	Pacific Ocean	-16.9587	-100.675	Upper Ocean
Pelagic	ERR868382	Pacific Ocean	-8.9111	-142.557	Upper Ocean
Pelagic	ERR868383	Indian Ocean	5.9998	73.9067	Upper Ocean
Pelagic	ERR868384	Pacific Ocean	22.7546	-158.007	Mesopelagic Ocean
Pelagic	ERR868385	Pacific Ocean	31.5168	-159.046	Upper Ocean
Pelagic	ERR868386	Pacific Ocean	22.7901	-157.944	Upper Ocean
Pelagic	ERR868387	Atlantic Ocean	-40.6511	-52.182	Upper Ocean
Pelagic	ERR868388	Pacific Ocean	-54.3739	-65.1342	Upper Ocean
Pelagic	ERR868389	Mediterranean Sea	36.5229	-4.0023	Upper Ocean
Pelagic	ERR868390	Pacific Ocean	6.3332	-102.943	Upper Ocean
Pelagic	ERR868391	Pacific Ocean	-21.5043	54.3563	Upper Ocean
Pelagic	ERR868393	Mediterranean Sea	35.759	14.2574	Upper Ocean
Pelagic	ERR868394	Pacific Ocean	-57.7338	-67.1084	Upper Ocean
Pelagic	ERR868395	Atlantic Ocean	31.6948	-64.2489	Upper Ocean
Pelagic	ERR868396	Indian Ocean	6.0001	73.8955	Upper Ocean
Pelagic	ERR868397	Indian Ocean	18.5918	66.622	Upper Ocean
Pelagic	ERR868398	Pacific Ocean	6.3378	-102.954	Upper Ocean
Pelagic	ERR868399	Indian Ocean	-2.0465	72.1568	Upper Ocean
Pelagic	ERR868400	Indian Ocean	20.8222	63.5133	Upper Ocean
Pelagic	ERR868401	Indian Ocean	21.9467	38.2517	Upper Ocean
Pelagic	ERR868402	Mediterranean Sea	38.4761	20.1705	Upper Ocean
Pelagic	ERR868403	Mediterranean Sea	39.8386	17.4155	Upper Ocean
Pelagic	ERR868404	Pacific Ocean	-29.7238	-101.16	Upper Ocean
Pelagic	ERR868405	Pacific Ocean	-23.1108	-134.933	Upper Ocean
Pelagic	ERR868406	Indian Ocean	20.8183	63.5047	Upper Ocean
Pelagic	ERR868407	Mediterranean Sea	39.1633	5.916	Upper Ocean
Pelagic	ERR868408	Indian Ocean	18.5918	66.622	Upper Ocean
Pelagic	ERR868409	Indian Ocean	14.5536	70.0128	Upper Ocean
Pelagic	ERR868410	Atlantic Ocean	44.0497	-16.6034	Upper Ocean
Pelagic	ERR868411	Atlantic Ocean	39.2305	-70.0377	Upper Ocean
Pelagic	ERR868412	Mediterranean Sea	37.4956	15.4945	Upper Ocean
Pelagic	ERR868413	Pacific Ocean	-33.6895	-71.998	Upper Ocean
Pelagic	ERR868414	Indian Ocean	19.0284	64.5126	Upper Ocean
Pelagic	ERR868415	Pacific Ocean	-29.668	-101.228	Upper Ocean
Pelagic	ERR868416	Pacific Ocean	-34.0614	-73.1066	Upper Ocean
Pelagic	ERR868417	Indian Ocean	-28.1762	-107.402	Mesopelagic Ocean
Pelagic	ERR868418	Mediterranean Sea	39.3991	19.3997	Upper Ocean
Pelagic	ERR868419	Pacific Ocean	-9.0063	-139.139	Upper Ocean
Pelagic	ERR868420	Pacific Ocean	6.4998	-94.9527	Upper Ocean
Pelagic	ERR868421	Atlantic Ocean	29.6394	-79.5395	Upper Ocean
Pelagic	ERR868422	Pacific Ocean	-5.2669	-85.2732	Upper Ocean
Pelagic	ERR868423	Atlantic Ocean	36.1811	-28.9373	Upper Ocean
Pelagic	ERR868424	Pacific Ocean	-12.9723	-96.0122	Upper Ocean
Pelagic	ERR868425	Pacific Ocean	-9.0063	-139.139	Upper Ocean
Pelagic	ERR868426	Pacific Ocean	-8.8999	-142.546	Upper Ocean
Pelagic	ERR868427	Pacific Ocean	6.6112	-153.054	Upper Ocean
Pelagic	ERR868428	Indian Ocean	20.8183	63.5047	Upper Ocean
Pelagic	ERR868429	Atlantic Ocean	44.0342	-16.5455	Upper Ocean
Pelagic	ERR868430	Atlantic Ocean	25.5264	-88.394	Upper Ocean
Pelagic	ERR868431	Mediterranean Sea	36.5229	-4.0023	Upper Ocean
Pelagic	ERR868432	Pacific Ocean	-23.2189	-129.5	Upper Ocean
Pelagic	ERR868433	Pacific Ocean	32.9986	-121.77	Upper Ocean
Pelagic	ERR868434	Atlantic Ocean	43.7182	-16.8714	Mesopelagic Ocean
Pelagic	ERR868435	Atlantic Ocean	36.5533	-6.5669	Upper Ocean
Pelagic	ERR868436	Pacific Ocean	-31.4424	-93.9597	Upper Ocean
Pelagic	ERR868437	Atlantic Ocean	36.5533	-6.5669	Upper Ocean
Pelagic	ERR868438	Pacific Ocean	-1.9002	-84.6265	Upper Ocean
Pelagic	ERR868439	Indian Ocean	18.4417	39.8567	Upper Ocean
Pelagic	ERR868440	Pacific Ocean	-5.2669	-85.2732	Upper Ocean
Pelagic	ERR868441	Pacific Ocean	1.9928	-84.5766	Upper Ocean
Pelagic	ERR868442	Pacific Ocean	-2.0133	-84.589	Upper Ocean
Pelagic	ERR868443	Pacific Ocean	-1.8902	-84.6141	Mesopelagic Ocean
Pelagic	ERR868444	Indian Ocean	-28.1698	-107.383	Upper Ocean
Pelagic	ERR868445	Atlantic Ocean	43.6792	-16.8344	Upper Ocean
Pelagic	ERR868446	Indian Ocean	-28.1874	-107.638	Upper Ocean
Pelagic	ERR868447	Pacific Ocean	-25.8051	-111.72	Upper Ocean
Pelagic	ERR868448	Mediterranean Sea	36.5103	-3.9747	Upper Ocean
Pelagic	ERR868449	Atlantic Ocean	34.6663	-71.2907	Mesopelagic Ocean
Pelagic	ERR868450	Pacific Ocean	2.0299	-84.5546	Upper Ocean
Pelagic	ERR868451	Atlantic Ocean	36.4121	-72.9289	Mesopelagic Ocean
Pelagic	ERR868452	Indian Ocean	-17.5869	42.1893	Upper Ocean
Pelagic	ERR868453	Pacific Ocean	-12.9794	-96.0232	Upper Ocean
Pelagic	ERR868454	Indian Ocean	18.5839	66.4727	Upper Ocean
Pelagic	ERR868455	Indian Ocean	18.7341	66.3896	Mesopelagic Ocean
Pelagic	ERR868456	Mediterranean Sea	42.4552	17.9348	Upper Ocean
Pelagic	ERR868457	Pacific Ocean	-12.9794	-96.0232	Upper Ocean
Pelagic	ERR868458	Pacific Ocean	0.0222	-153.686	Upper Ocean
Pelagic	ERR868459	Atlantic Ocean	36.1715	-29.023	Upper Ocean
Pelagic	ERR868460	Indian Ocean	23.36	37.2183	Upper Ocean
Pelagic	ERR868461	Atlantic Ocean	-44.5913	-52.1804	Upper Ocean
Pelagic	ERR868462	Pacific Ocean	0.0003	-153.676	Upper Ocean
Pelagic	ERR868463	Indian Ocean	18.4417	39.8567	Upper Ocean
Pelagic	ERR868464	Pacific Ocean	22.7901	-157.944	Upper Ocean
Pelagic	ERR868465	Pacific Ocean	-12.9723	-96.0122	Upper Ocean
Pelagic	ERR868466	Pacific Ocean	-8.9068	-140.283	Upper Ocean
Pelagic	ERR868467	Pacific Ocean	6.3559	-103.06	Mesopelagic Ocean
Pelagic	ERR868468	Indian Ocean	18.7341	66.3896	Mesopelagic Ocean
Pelagic	ERR868469	Pacific Ocean	-8.9068	-140.283	Upper Ocean
Pelagic	ERR868470	Pacific Ocean	2.0649	-84.5546	Mesopelagic Ocean
Pelagic	ERR868471	Indian Ocean	27.16	27.1433	Upper Ocean
Pelagic	ERR868472	Pacific Ocean	2.0299	-84.5546	Upper Ocean
Pelagic	ERR868473	Mediterranean Sea	39.0609	5.9422	Upper Ocean
Pelagic	ERR868474	Atlantic Ocean	25.6236	-88.45	Mesopelagic Ocean
Pelagic	ERR868475	Pacific Ocean	-8.9971	-39.1963	Upper Ocean
Pelagic	ERR868476	Pacific Ocean	-16.9601	-100.633	Upper Ocean
Pelagic	ERR868477	Pacific Ocean	14.2035	-116.626	Upper Ocean
Pelagic	ERR868478	Indian Ocean	-0.6625	73.161	Upper Ocean
Pelagic	ERR868479	Atlantic Ocean	34.1504	-56.9684	Mesopelagic Ocean
Pelagic	ERR868480	Pacific Ocean	31.5213	-158.996	Upper Ocean
Pelagic	ERR868481	Pacific Ocean	-8.9109	-140.285	Upper Ocean
Pelagic	ERR868482	Mediterranean Sea	37.4532	15.4596	Upper Ocean
Pelagic	ERR868483	Atlantic Ocean	-40.6241	-51.9229	Upper Ocean
Pelagic	ERR868484	Indian Ocean	18.5745	66.4895	Upper Ocean
Pelagic	ERR868485	Pacific Ocean	22.7598	-157.957	Upper Ocean
Pelagic	ERR868486	Indian Ocean	14.6059	69.9776	Upper Ocean
Pelagic	ERR868487	Indian Ocean	20.8222	63.5133	Upper Ocean
Pelagic	ERR868488	Mediterranean Sea	35.7528	14.2765	Upper Ocean
Pelagic	ERR868489	Pacific Ocean	-9.1504	-140.522	Upper Ocean
Pelagic	ERR868490	Pacific Ocean	31.528	-159.022	Mesopelagic Ocean
Pelagic	ERR868491	Pacific Ocean	-9.0714	-140.597	Upper Ocean
Pelagic	ERR868492	Pacific Ocean	14.2075	-116.647	Upper Ocean
Pelagic	ERR868493	Pacific Ocean	-13.0023	-95.9759	Upper Ocean
Pelagic	ERR868494	Pacific Ocean	-9.0714	-140.597	Upper Ocean
Pelagic	ERR868495	Atlantic Ocean	39.2392	-70.0343	Mesopelagic Ocean
Pelagic	ERR868496	Mediterranean Sea	39.5705	17.4101	Upper Ocean
Pelagic	ERR868498	Indian Ocean	19.0393	64.4913	Upper Ocean
Pelagic	ERR868499	Pacific Ocean	-25.8051	-111.72	Upper Ocean
Pelagic	ERR868500	Pacific Ocean	11.2723	-152.371	Upper Ocean
Pelagic	ERR868501	Pacific Ocean	-23.2811	-129.395	Upper Ocean
Pelagic	ERR868502	Pacific Ocean	-0.0283	-84.5862	Upper Ocean
Pelagic	ERR868503	Indian Ocean	19.0393	64.4913	Upper Ocean
Pelagic	ERR868504	Mediterranean Sea	34.453	14.9538	Upper Ocean
Pelagic	ERR868505	Pacific Ocean	0.0307	-84.612	Upper Ocean
Pelagic	ERR868506	Pacific Ocean	2.0649	-84.5546	Mesopelagic Ocean
Pelagic	ERR868507	Indian Ocean	0.0033	71.6428	Upper Ocean
Pelagic	ERR868508	Indian Ocean	4.6599	73.4856	Upper Ocean
Pelagic	ERR868509	Atlantic Ocean	29.851	-79.7064	Upper Ocean
Pelagic	ERR868510	Atlantic Ocean	36.5533	-6.5669	Upper Ocean
Pelagic	ERR868511	Atlantic Ocean	35.8427	-37.1526	Upper Ocean
Pelagic	ERR868512	Pacific Ocean	14.2025	-116.643	Mesopelagic Ocean
Pelagic	ERR868513	Pacific Ocean	-8.9971	-139.196	Upper Ocean
Pelagic	SRR1217367	Pacific Ocean	-20.0541	-176.134	Dark Ocean
Pelagic	SRR1217452	Pacific Ocean	-20.1801	-176.601	Dark Ocean
Pelagic	SRR1217459	Pacific Ocean	-20.0541	-176.134	Dark Ocean
Pelagic	SRR1217460	Pacific Ocean	-22.7613	-176.189	Dark Ocean
Pelagic	SRR1217461	Pacific Ocean	-20.6821	-176.183	Mesopelagic Ocean
Pelagic	SRR1217462	Pacific Ocean	-21.99	-176.189	Dark Ocean
Pelagic	SRR1217463	Pacific Ocean	-22.7613	-176.189	Dark Ocean
Pelagic	SRR1217465	Pacific Ocean	-20.6821	-176.183	Dark Ocean
Pelagic	SRR1217564	Pacific Ocean	-20.0541	-176.134	Dark Ocean
Pelagic	SRR1217565	Pacific Ocean	-22.7613	-176.189	Dark Ocean
Pelagic	SRR1217566	Pacific Ocean	-20.0541	-176.134	Dark Ocean
Pelagic	SRR1217567	Pacific Ocean	-20.1801	-176.601	Dark Ocean
Pelagic	SRR1298803	Pacific Ocean	25.0335	-157.333	Upper Ocean
Pelagic	SRR1298808	Pacific Ocean	25.0335	-157.333	Upper Ocean
Pelagic	SRR1298809	Pacific Ocean	25.0335	-157.333	Upper Ocean
Pelagic	SRR1298810	Pacific Ocean	24.8502	-157.467	Upper Ocean
Pelagic	SRR1298812	Pacific Ocean	25.0335	-157.333	Mesopelagic Ocean
Pelagic	SRR1298813	Pacific Ocean	25.0335	-157.333	Mesopelagic Ocean
Pelagic	SRR1298814	Pacific Ocean	25.0335	-157.333	Mesopelagic Ocean
Pelagic	SRR1298815	Pacific Ocean	25.0335	-157.333	Mesopelagic Ocean
Pelagic	SRR1298816	Pacific Ocean	24.4008	-157.867	Mesopelagic Ocean
Pelagic	SRR1298821	Pacific Ocean	24.4008	-157.867	Mesopelagic Ocean
Pelagic	SRR1539203	Mediterranean Sea	38.0685	-0.231994	Upper Ocean
Pelagic	SRR1539382	Mediterranean Sea	38.0685	-0.231994	Upper Ocean
Pelagic	SRR1539383	Mediterranean Sea	38.0685	-0.231994	Upper Ocean
Pelagic	SRR1539385	Mediterranean Sea	38.0685	-0.231994	Upper Ocean
Pelagic	SRR1539645	Mediterranean Sea	38.0685	-0.231994	Upper Ocean
Pelagic	SRR1699478	Atlantic Ocean	54.1842	7.9	Upper Ocean
Pelagic	SRR1699480	Atlantic Ocean	54.1842	7.9	Upper Ocean
Pelagic	SRR1699482	Pacific Ocean	34.3919	-119.846	Upper Ocean
Pelagic	SRR1699484	Atlantic Ocean	54.1842	7.9	Upper Ocean
Pelagic	SRR1699487	Atlantic Ocean	54.1842	7.9	Upper Ocean
Pelagic	SRR1699595	Atlantic Ocean	54.1842	7.9	Upper Ocean
Pelagic	SRR1699645	Atlantic Ocean	54.1842	7.9	Upper Ocean
Pelagic	SRR1699659	Atlantic Ocean	54.1842	7.9	Upper Ocean
[truncated: 103 more rows]
